1 **Swedish Nerve Growth Factor Mutation (NGF<sup>R100W</sup>) Defines a Role for TrkA and p75<sup>NTR</sup> in**  
2 **Nociception**

3  
4  
5  
6  
7  
8  
9

Kijung Sung<sup>1</sup>, Luiz F. Ferrari<sup>2</sup>, Wanlin Yang<sup>1</sup>, ChiHye Chung<sup>3</sup>, Xiaobei Zhao<sup>1</sup>, Yingli Gu<sup>1,4</sup>, Suzhen Lin<sup>1</sup>, Kai Zhang<sup>5</sup>, Bianxiao Cui<sup>5</sup>, Matthew L. Pearn<sup>6,7</sup>, Michael T. Maloney<sup>8</sup>, William C. Mobley<sup>1</sup>, Jon D. Levine<sup>2</sup>, Chengbiao Wu<sup>1,7</sup>

10 <sup>1</sup>Department of Neurosciences, University of California San Diego, School of Medicine, La Jolla,  
11 CA  
12 <sup>2</sup>Department of Oral Surgery, University of California San Francisco, San Francisco, CA  
13 <sup>3</sup>Department of Biological Sciences, Konkuk University, 120 Neungdong-ro, Gwangjin-gu, Seoul,  
14 143-701, South Korea  
15 <sup>4</sup> The Fourth Hospital of Harbin Medical University, Harbin, Heilongjiang, China  
16 <sup>5</sup>Department of Chemistry, Stanford University, Stanford, CA  
17 <sup>6</sup>Department of Anesthesiology, University of California San Diego, La Jolla, CA  
18 <sup>7</sup>V.A. San Diego Healthcare System, San Diego, CA  
19 <sup>8</sup>Department of Neurosciences, Stanford University, Stanford, CA  
20  
21  
22

23 **Running title:** *NGF<sup>R100W</sup> fails to engage p75<sup>NTR</sup> to elicit pain.*  
24  
25  
26  
27  
28  
29  
30  
31  
32

33 Corresponding authors  
34  
35

36 Chengbiao Wu, PhD  
37 Department of Neurosciences  
38 University of California San Diego  
39 Medical Teaching Facility (MTF), Room 312 MC-0624  
40 9500 Gilman Drive, La Jolla, CA 92093  
41 Phone: 858-534-0996  
42 Fax: 858-534-4782  
43 EMAIL: [chw049@ucsd.edu](mailto:chw049@ucsd.edu)  
44  
45

## 1 **Abstract**

2 Nerve growth factor (NGF) exerts multiple functions on target neurons throughout  
3 development. The recent discovery of a point mutation leading to a change from arginine to  
4 tryptophan at residue 100 in the mature NGF $\beta$  sequence (NGF<sup>R100W</sup>) in patients with hereditary  
5 sensory and autonomic neuropathy, type V (HSAN V), made it possible to distinguish the signaling  
6 mechanisms that lead to two functionally different outcomes of NGF: trophic versus nociceptive.  
7 We performed extensive biochemical, cellular and live imaging experiments to examine the  
8 binding and signaling properties of NGF<sup>R100W</sup>. Our results show that, similar to the wildtype NGF  
9 (wtNGF), the naturally occurring NGF<sup>R100W</sup> mutant was capable of binding to and activating the  
10 TrkA receptor and its downstream signaling pathways to support neuronal survival and  
11 differentiation. However, NGF<sup>R100W</sup> failed to bind and stimulate the 75kD neurotrophic factor  
12 receptor (p75<sup>NTR</sup>)-mediated signaling cascades (i.e. the RhoA-Cofilin pathway). Intraplantar  
13 injection of NGF<sup>R100W</sup> into adult rats induced neither TrkA-mediated thermal nor mechanical acute  
14 hyperalgesia, but retained the ability to induce chronic hyperalgesia based on agonism for TrkA  
15 signaling. Taken together, our studies provide evidence that NGF<sup>R100W</sup> retains trophic support  
16 capability through TrkA and one aspect of its nociceptive signaling, but fails to engage p75<sup>NTR</sup>  
17 signaling pathways. Our findings suggest that wtNGF acts through TrkA to regulate the delayed  
18 priming of nociceptive responses. The integration of both TrkA and p75<sup>NTR</sup> signaling thus appears  
19 to regulate neuroplastic effects of NGF in peripheral nociception.

20

21

## 22 **Significance Statement**

23 In the present study, we characterized the naturally occurring NGF<sup>R100W</sup> mutant that is associated  
24 with hereditary sensory and autonomic neuropathy, type V. We have demonstrated for the first  
25 time that NGF<sup>R100W</sup> retains trophic support capability through TrkA but fails to engage p75<sup>NTR</sup>  
26 signaling pathways. Furthermore, following Intraplantar injection into adult rats, NGF<sup>R100W</sup>  
27 induced neither thermal nor mechanical acute hyperalgesia, but retained the ability to induce  
28 chronic hyperalgesia. We have also provided evidence that the integration of both TrkA- and  
29 p75<sup>NTR</sup>-mediated signaling thus appears to regulate neuroplastic effects of NGF in peripheral  
30 nociception. Our study with NGF<sup>R100W</sup> suggests that it is possible to uncouple trophic effect from  
31 nociceptive function, both induced by wildtype NGF.

1 **Abbreviations:**

- 2 NGF: nerve growth factor;
- 3 NGF<sup>R100W</sup>: NGF mutation with a change from tryptophan (W) to arginine (R) at the 100 residue.
- 4 TrkA: Tropomyosin receptor kinase A;
- 5 p75<sup>NTR</sup>: the 75kD neurotrophic factor receptor;
- 6 HSAN V: hereditary sensory and autonomic neuropathy, type V;
- 7 BFCN: basal forebrain cholinergic neurons;
- 8 PNS: peripheral nervous system;
- 9 CNS: central nervous system;
- 10 BDNF: brain-derived neurotrophic factor;
- 11 NT: neurotrophin;
- 12 TrkB: Tropomyosin receptor kinase B;
- 13 TrkC: Tropomyosin receptor kinase C;
- 14 RhoA: Ras homolog gene family, member A;
- 15 NF- $\kappa$ B, nuclear factor kappa B;
- 16 Akt: Protein kinase B;
- 17 JNK: c-Jun N-terminal kinases;
- 18 AD: Alzheimer's disease;
- 19 CSF: cerebrospinal fluid;
- 20 HIV: human immunodeficiency virus
- 21 CIPA: congenital insensitivity to pain with anhidrosis;
- 22 ERK: extracellular signal-related kinase;
- 23 PI3K: phosphatidylinositol 3-kinase;
- 24 PLC $\gamma$ : and phospholipase C $\gamma$ ;
- 25 PGE<sub>2</sub>: Prostaglandin E<sub>2</sub>;
- 26 PCR: polymerase chain reaction;
- 27 GFP: green fluorescent protein;
- 28 QD: quantum dots;
- 29 HEK293FT: Human embryonic kidney 293FT cell line;
- 30 KKE: NGF mutant protein with mutation at: K32A/K34A/E35A in the mature sequence;
- 31  $\Delta$ 9/13: NGF mutant protein with deletion of N-terminal 9-13 residues in the mature sequence;
- 32 DMEM: Dulbecco's Modified Eagle's Medium;
- 33 PMSF: phenylmethylsulfonyl fluoride;
- 34 SDS-PAGE: sodium dodecyl sulfate polyacrylamide gel electrophoresis;

- 1 DMSO: dimethyl sulfoxide;
- 2 AS: anti-sense oligos;
- 3 MM: mis-matched oligos;
- 4 E15.5 DRG: embryonic day 15.5 dorsal root ganglion;
- 5 ECD: extracellular domain;
- 6 MEM: Minimum Essential Medium;
- 7 TIRF: Total Internal Reflection Fluorescence;
- 8 EMCCD: electron multiplying charge-coupled device;
- 9 PC12: a cell line derived from a pheochromocytoma of the rat adrenal medulla;
- 10 BSA: Bovine Serum Albumin;
- 11 PBS: phosphate buffered saline;
- 12 IgG: Immunoglobulin G;
- 13 DIC: Days In Culture;
- 14
- 15
- 16
- 17

## 1 Introduction

2 Nerve growth factor (NGF), discovered as a result of potent trophic actions on sensory  
3 and sympathetic neurons of the peripheral nervous system (PNS) in the 1950s(Levi-Montalcini  
4 and Hamburger, 1951), also regulates the trophic status of striatal and basal forebrain cholinergic  
5 neurons (BFCNs) of the central nervous system (Levi-Montalcini and Hamburger, 1951;  
6 Svendsen et al., 1994; Li and Jope, 1995; Kew et al., 1996; Conover and Yancopoulos, 1997;  
7 Lehmann et al., 1999). With the discovery of brain-derived neurotrophic factor (BDNF),  
8 Neurotrophin 3 (NT-3) and Neurotrophin 4 (NT-4), NGF is now known as a member of the  
9 neurotrophin family(Chao and Hempstead, 1995; Huang and Reichardt, 2001; Chao, 2003). NGF  
10 acts through two known receptors, the 140 kD tyrosine receptor kinase A (TrkA) and the 75 kD  
11 neurotrophin receptor (p75<sup>NTR</sup>) to transmit signals to the cytoplasm and nucleus of responsive  
12 neurons (Bothwell, 1995; Chao and Hempstead, 1995; Kaplan and Miller, 1997). NGF signaling  
13 through TrkA elicits many of the classical neurotrophic actions ascribed to NGF(Loeb and Greene,  
14 1993). TrkB and TrkC mediate the signaling of NT-3 and NT-4, respectively(Huang and Reichardt,  
15 2001; Chao, 2003). NGF as well as all members of the family also signal through p75<sup>NTR</sup>(Huang  
16 and Reichardt, 2001; Chao, 2003). p75<sup>NTR</sup> contributes to sphingomyelin-ceramide metabolism  
17 (Dobrowsky et al., 1994; Dobrowsky et al., 1995) and modulates RhoA activity to regulate axonal  
18 growth(Yamashita et al., 1999; Gehler et al., 2004). In addition, p75<sup>NTR</sup> has been shown to  
19 activate the NF- $\kappa$ B, Akt, and JNK pathways (Harrington et al., 2002; Roux and Barker, 2002) to  
20 either induce apoptosis or to promote cell survival and differentiation (Chao and Hempstead,  
21 1995; Casaccia-Bonnel et al., 1998; Salehi et al., 2000; Roux and Barker, 2002; Nykjaer et al.,  
22 2005).

23 Given its robust trophic effects, NGF has been investigated for therapeutic properties in  
24 neurodegenerative disorders(Apfel et al., 1994; Andreev et al., 1995; Apfel and Kessler, 1995;  
25 Blesch and Tuszynski, 1995; Anand et al., 1996; Apfel and Kessler, 1996; Apfel et al., 1998; Apfel,  
26 1999b, a, 2000, 2002; Aloe et al., 2012). In one example, NGF's robust trophic effects on BFCNs  
27 has suggested a role in treating AD in which this population degenerates (Olson, 1993; Hefti,  
28 1994; Scott and Crutcher, 1994; Blesch and Tuszynski, 1995; Knusel and Gao, 1996; Koliatsos,  
29 1996; Eriksdotter Jonhagen et al., 1998; Williams et al., 2006; Mufson et al., 2008; Schindowski  
30 et al., 2008; Schulte-Herbruggen et al., 2008; Cuello et al., 2010). Unfortunately, features of the  
31 biology of NGF have limited the extent to which it could be evaluated. Inability to cross the blood  
32 brain barrier prevented systemic administration. Delivery via the ventricular system even at low  
33 doses resulted in pain and studies in primates demonstrated Schwann cell hyperplasia that  
34 served to compromise CSF flow (Winkler et al., 1997). A recent Phase II trial in which NGF was

1 delivered via virus to the basal forebrain demonstrated safety and was without pain(Tuszynski et  
2 al., 2015). Marked sprouting of BFCN fibers was evidence of a potent trophic effect but cognitive  
3 measures were unaffected(Rafii et al., 2014). Significant efforts were also invested to investigate  
4 NGF as a treatment for diabetic polyneuropathy(Apfel and Kessler, 1995; Anand et al., 1996;  
5 Apfel and Kessler, 1996; Tomlinson et al., 1996; Elias et al., 1998; Apfel, 1999b; Goss et al.,  
6 2002; Murakawa et al., 2002; Kanda, 2009). NGF treatment demonstrated some benefit in Phase  
7 II trial at 0.1 and 0.3 $\mu$ g/kg, but associated with dose-dependent hyperalgesia at the injection  
8 site(Apfel, 1999b, a). A large scale Phase III trial with a dose of 0.1 $\mu$ g/kg showed no beneficial  
9 effect (Apfel et al., 1998; Apfel, 2002).

10 NGF is not only a trophic factor but also functions as one of the key molecules for  
11 mediating inflammatory pain and neuropathic pain in the PNS (Lewin and Mendell, 1993; Lewin  
12 et al., 1993; Chuang et al., 2001; Watanabe et al., 2008). As such, clinical trials in which large  
13 doses of NGF were infused in patients with AD had to be terminated due to the extreme side  
14 effects of pain(Aloe et al., 2012). Other clinical trials using NGF in treating diabetic neuropathies  
15 and peripheral neuropathies in HIV were also discontinued after reports of serious side effects  
16 such as back pain, injection site hyperalgesia, myalgia, and weight loss (Hellweg and Hartung,  
17 1990; Lein, 1995; Apfel et al., 1998; Unger et al., 1998; Rask, 1999; McArthur et al., 2000;  
18 Quasthoff and Hartung, 2001; Schifitto et al., 2001; Apfel, 2002; Pradat, 2003; Walwyn et al.,  
19 2006). Thus, the adverse effect of significant pain caused by NGF has severely limited its  
20 therapeutic use in treating neurodegenerative disorders. To overcome these pain-causing side  
21 effects of NGF, it is of paramount importance to elucidate the role of NGF and its receptor  
22 signaling by TrkA and p75<sup>NTR</sup> in nociception.

23 A large body of genetic and clinical evidence has pointed to both TrkA and p75<sup>NTR</sup> as  
24 contributing factors to sensitization of inflammatory pain mediated by NGF. For example,  
25 recessive mutations in TrkA cause hereditary sensory and autonomic neuropathy type IV (HSAN  
26 IV) (OMIM # 256800), also known as congenital insensitivity to pain with anhidrosis (Indo, 2001,  
27 2002). Strong evidence supports a role of TrkA in mediating the sensitization effect of NGF:  
28 attenuation of TrkA expression(Malik-Hall et al., 2005; Alvarez and Levine, 2014) and  
29 pharmacological inhibition of TrkA-mediated signaling pathways extracellular signal-related  
30 kinase (ERK), phosphatidylinositol 3-kinase (PI3K), and phospholipase C $\gamma$  (PLC $\gamma$ ) all reduced  
31 NGF-induced hyperalgesia (Fang et al., 2005; Malik-Hall et al., 2005; Summer et al., 2006;  
32 Mantyh et al., 2011; Alvarez and Levine, 2014; Ashraf et al., 2016). Furthermore, NGF still evoked  
33 hyperalgesia in mice lacking p75<sup>NTR</sup>, pointing to the involvement of TrkA(Bergmann et al., 1998).  
34 Evidence that p75<sup>NTR</sup> has a role in pain signaling pathways is largely indirect. In one example,

1 injecting a neutralizing antibody to p75<sup>NTR</sup> prevented NGF-induced pain behavior and NGF-  
2 mediated increases in action potentials in sensory neurons (Zhang and Nicol, 2004; Watanabe et  
3 al., 2008; Iwakura et al., 2010). Therefore, both TrkA and p75<sup>NTR</sup> signals contribute to pain  
4 induced by NGF. However, how these two receptor(s) interact to mediate pain is poorly defined.

5       Recently, patients in consanguineous Swedish families suffering from length-dependent  
6 loss of pain that often leads to bone fractures and joint destruction were shown to harbor a  
7 homozygous missense mutation in NGF (Einarsdottir et al., 2004; Carvalho et al., 2011). The  
8 disorder was labeled hereditary sensory autonomic neuropathy type V (HSAN V) (Online  
9 Mendelian Inheritance in Man (OMIM) # 608654). Genetic analysis of these HSAN V patients  
10 revealed a point mutation (661C>T) causing a substitution of tryptophan (W) for arginine (R) at  
11 position 211 in the pro-form of the NGF polypeptide (pro-NGF<sup>R221W</sup>); this residue corresponds to  
12 the position 100 in the mature protein (NGF<sup>R100W</sup>) (Einarsdottir et al., 2004). Unlike HSAN type  
13 IV, which results from mutations in TrkA, HSAN V patients appear to have normal cognitive  
14 function, suggesting that the mutant NGF may retain its trophic functions in the CNS (Einarsdottir  
15 et al., 2004). We and others reasoned that NGF<sup>R100W</sup> provides a tool to decipher possible  
16 differences in the trophic and nociceptive actions of NGF (Covaceuszach et al., 2010; Capsoni et  
17 al., 2011; Capsoni, 2014).

18       Initial characterization of NGF<sup>R100W</sup> revealed that the R100 mutation may disrupt the  
19 processing of pro-NGF to mature NGF in cultured cells, resulting in relatively higher percentage  
20 of NGF secreted as the pro-form (Larsson et al., 2009). Given the difficulties in expressing  
21 NGF<sup>R100W</sup>, Catanneo and colleagues examined a different series of residues at position 100,  
22 including NGF<sup>R100E</sup> and NGF double mutant (NGF<sup>P61S/R100E</sup>) using recombinant  
23 techniques (Capsoni et al., 2011). They discovered that these NGF<sup>R100</sup> mutants bound normally to  
24 TrkA, but failed to bind to p75<sup>NTR</sup> (Covaceuszach et al., 2010). This finding suggested that failure  
25 to activate p75<sup>NTR</sup> signaling was sufficient to attenuate pain induced by NGF and suggesting that  
26 TrkA signaling had little or no effect in pain (Capsoni et al., 2011). The authors speculated that  
27 NGF<sup>R100</sup> mutant would allow for development of p75<sup>NTR</sup> antagonists, such as NGF<sup>R100W</sup> as a  
28 'painless NGF' therapeutic agent (Malerba et al., 2015).

29       In the present study, we examined the binding and signaling properties of the mature form  
30 of the naturally occurring mutant NGF (NGF<sup>R100W</sup>) in HSAN V and compared the effects to those  
31 of wtNGF and NGF mutants that selectively engage and signal through either TrkA or p75<sup>NTR</sup>.  
32 We discovered that NGF<sup>R100W</sup> retains binding and signaling through TrkA to induce trophic effects  
33 but not binding or activation of p75<sup>NTR</sup>. Our findings are evidence that NGF<sup>WT</sup> acts through both  
34 p75<sup>NTR</sup> and TrkA to cause pain. Our findings are consistent with a necessary role for TrkA in both

1 acute sensitization and delayed priming of nociceptive responses. In contrast, signaling through  
2 p75 appears to be unnecessary for acute sensitization but does contribute to priming. The  
3 integration of both TrkA and p75 signaling thus appears to regulate neuroplastic effects of NGF  
4 in peripheral nociception.

5

6



## 1 **Materials and Methods**

### 2 **Ethic Statement:**

3 All experiments involving the use of animals were approved by the Institutional Animal  
4 Care and Use Committee of University of California San Diego and University of California San  
5 Francisco. Surgical and animal procedures were carried out strictly following the NIH Guide for  
6 the Care and Use of Laboratory Animals.

### 7 **Chemicals, oligos and reagents:**

8 Streptavidin-QD605, -655 (Q10103MP, Q10123MP) conjugates were from Invitrogen, all  
9 other chemicals were from Sigma unless noted otherwise. Recombinant extracellular domains of  
10 p75<sup>NTR</sup> were a generous gift from Dr. Sung Ok Yoon of Ohio State University. Prostaglandin E2  
11 (PGE<sub>2</sub>) was purchased from Sigma (Cat# 82475). NGF (wtNGF, NGF<sup>R100W</sup>, KKE, Δ9/13) proteins  
12 were produced in our own laboratory(Sung et al., 2011).

### 13 **Cloning:**

14 Mouse pro-NGF was amplified by PCR from a NGF-GFP plasmid (a generous gift from  
15 Professor Lessmann, Mainz, Germany). The forward primer sequence was: 5'-  
16 acgaattccaccatgtccatgtgttctactctgatcactgcg-3' and the reverse primer sequence was: 5'-  
17 gatggatcctctgtgccattcgatttctgagcctcgaagatgctggtcagaccgccaccgacctccacggcggtggc-3'. The  
18 reverse primer contains a sequence coding for the 17-amino acid AviTag:  
19 GGGLNDIFEAQKIEWHE. The sequence was based on the #85 AviTag peptide sequence  
20 described previously (Schatz, 1993). One glutamic acid residue was added to the C-terminal  
21 AviTag based on a finding by Avidity ([www.avidity.com](http://www.avidity.com)) that it greatly enhanced the biotinylation  
22 rate of the AviTag (Beckett et al., 1999). Platinum pfx DNA polymerase (Invitrogen,  
23 Cat#11708021) was used following the manufacture's instruction. The 50 μl of reaction was  
24 denatured at 94°C for 4 min, followed by 25 cycles of amplification (30 s at 94°C; 30 s at 50°C;  
25 90 s at 68°C). An additional extension was performed at 68°C for 4 min. The PCR product was  
26 purified and digested with EcoRI (Fermentas, Cat# FD0274) and BamHI (Fermentas, Cat#  
27 FD0054). It was ligated in-frame into the pcDNA3.1-myc-His vector that was predigested with  
28 EcoRI/BamHI. The resulting construct was designated as pcDNA3.1-NGFavi. BirA was amplified  
29 by PCR from pET21a-BirA (purchased from [www.Addgene.com](http://www.Addgene.com); Plasmid# 20857) (Howarth et  
30 al., 2005) using a forward primer (forward primer: 5'-gtgaac atg gctagcatgact-3') and a reverse  
31 primer (5'-ggtgctcgagtcgatcgccgccaagct-3' (containing an XhoI site). The PCR was carried out  
32 using Pfx as described above. The PCR product was digested with XhoI (Fermentas, Cat#  
33 FD0694) and was subcloned into pcDNA3.1 myc.his (+) vector (Invitrogen) that was pre-cut with  
34 EcoRV (Fermentas, Cat# FD0303) and XhoI. The resulting plasmid was designated as

1 pcDNA3.1-BirA. All primers were purchased from Elim Biopharmaceuticals, Inc (Hayward, CA).  
2 All constructs were verified by sequencing (Elim Biopharmaceuticals, Inc.). NGF<sup>R100W</sup> was cloned  
3 using the same method, but with a point mutation at 661 (C>T). The KKE and  $\Delta$ 9/13 mutant  
4 constructs were obtained from Dr. K. Neet of Rosalind Franklin University (Hughes et al., 2001;  
5 Mahapatra et al., 2009), were subcloned to the pcDNA3.1-myc-His vector with an Avitag (Sung  
6 et al., 2011).

#### 7 **Protein purification:**

8 HEK293FT cells were grown in 15 cm plates to 70% confluency. Cells were changed to  
9 25 ml of DMEM-high glucose, serum-free media that was supplemented with 50  $\mu$ M d-biotin  
10 (Sigma, Cat# B4639). 15–21  $\mu$ g pcDNA3.1-NGFavi, NGF<sup>R100W</sup>avi, KKEavi, and  $\Delta$ 9/13avi plasmids  
11 DNA plus 15–21  $\mu$ g pcDNA3.1-BirA plasmids DNA were mixed with 1 ml of DMEM-high glucose  
12 media and 60  $\mu$ l of Turbofect (Fermentas, Cat# R0531). The mixture was incubated at room  
13 temperature for 15 min and was then added into the media by drop-wise method. Transfected  
14 HEK293FT cells were incubated at 37°C, 5% CO<sub>2</sub>. 72 hrs post transfection, media were collected  
15 for protein purification.

16 Media were harvested and adjusted to 30 mM phosphate buffer, pH 8.0, 500 mM NaCl,  
17 20 mM imidazole, and a cocktail of protease inhibitors (1 mM PMSF from Sigma Cat# P7626, and  
18 1  $\mu$ l/ml aprotinin from Sigma, Cat#A6279). After incubation on ice for 15 min, media were cleared  
19 by centrifugation at 18,000 rpm for 30 min using a Beckman JA-20 rotor. Ni-NTA resins (Qiagen,  
20 Cat# 30250) were rinsed with the washing buffer (30 mM phosphate buffer, pH8.0, 500 mM NaCl,  
21 20 mM imidazole, and a cocktail of protease inhibitors from Sigma, Cat# S8820). Ni-NTA resins  
22 were added to the media at a concentration of 0.3 ml Ni-NTA/100 ml media and incubated  
23 overnight with rotation at 4°C. The media/Ni-NTA slurry was loaded onto a column and the  
24 captured Ni-NTA resins were washed with 10 ml wash buffer and eluted with 5 ml elution buffer  
25 (30 mM phosphate buffer, pH8.0, 500 mM NaCl, 300 mM imidazole, protease inhibitors). Every  
26 500  $\mu$ l volume of elution was collected. The purity and concentration of NGF was assessed by  
27 SDS-PAGE using a silver staining kit (Fast silver, G-Biosciences, Cat# 786-30, Maryland Heights,  
28 MO). Known quantities of NGF purified from mouse sub maxillary glands were used as standards.  
29 The first two eluted fraction normally contained most of purified proteins.

#### 30 **Cell culture and transfection:**

31 PC12 cells or a subclone of PC12 cells, PC12M, PC12<sup>nr5</sup> cells were cultured as described  
32 previously (Wu et al., 2001; Wu et al., 2007). NIH3T3-TrkA, NIH3T3-p75<sup>NTR</sup> cells were as  
33 described (Huang et al., 1999). HEK293FT cells (Invitrogen, Cat# R70007) cells were cultured in

1 DMEM-high glucose media (4.5 g/l glucose, Mediatech, Cat#10-013-CV), 10% FBS, 1%  
2 penicillin/streptomycin.

3

#### 4 **Administration of wtNGF, NGF<sup>R100W</sup>, prostaglandin E2 (PGE<sub>2</sub>), oligos and inhibitors to adult** 5 **rats.**

6 Experiments were performed on adult male Sprague-Dawley rats (220-240g, Charles  
7 River, Hollister, CA, USA). All experiments were carried out following protocols that have been  
8 approved by the University of California San Francisco Committee on Animal Research and  
9 conformed to National Institutes of Health Guidelines for the Care and Use of Laboratory Animals.  
10 Either 200 ng of wtNGF or NGF<sup>R100W</sup> was injected intradermally on the dorsum, of one hind paw  
11 of adult rats. Nociceptive threshold in the injected paws were then tested over time.

12 For studies using K252a (Sigma#: K1639) and GW4869 (Sigma#: D1692), both inhibitors  
13 were dissolved in DMSO (2 µg/µl) and then diluted to a concentration of 0.2 µg/µl in saline at the  
14 time of the experiments. Five mins prior to injection of NGF, 5 µl (1 µg) of inhibitors were  
15 administered intradermally on the dorsum of the hind paw, at the same site at which NGF was  
16 injected. The experimental design is illustrated in Figure 7A.

#### 17 **Randall-Selitto mechanical and Hargreaves thermal tests:**

18 Mechanical nociceptive threshold measured using the Randall-Selitto paw pressure test  
19 (Randall and Selitto, 1957) with an Ugo Basile Algesymeter (Stoelting, Chicago, IL, USA) (Ferrari  
20 et al., 2010; Ferrari et al., 2013; Ferrari et al., 2015a; Ferrari et al., 2015b). This device exerts a  
21 linear increase in force to the dorsum of the hind paw of the rats. Prior to the test, rats were kept  
22 in individual restrainers for 20 min to acclimatize them to the experimental environment. The  
23 restrainers had openings that allowed rats to extend hind paws during the test. Mechanical  
24 thresholds were calculated as the average of three readings.

25 Thermal threshold was measured using the Hargreaves test, which applies heat stimuli by  
26 an adjustable high-intensity movable halogen projector lamp (Malmberg and Yaksh, 1993).  
27 Baseline responses were first measured and were averaged from at least two readings. 600 ng  
28 of wtNGF or NGF<sup>R100W</sup> was then injected in the plantar surface of one hind paw, under isoflurane  
29 anesthesia. After recovery from the anesthesia, in less than a min, they were placed on a glass  
30 plate, and acclimatized for 20 min. Thermal nociceptive thresholds were evaluated within 1 hr  
31 after the injections.

#### 32 **Binding and internalization assays of NGF-QD:**

33 At 50% confluence of NIH3T3-TrkA and NIH3T3-p75<sup>NTR</sup>, cells were starved in serum free  
34 DMEM-high glucose media for 4 h at 37°C. NGF or NGF mutants were conjugated with QD 655-

1 streptavidin (Invitrogen, Cat# Q10121MP) on ice 4°C for 30 min. 0.2 nM of conjugate was applied  
2 to cells. Cells were incubated at 20°C for 20-30 min, washed with serum free DMEM-high glucose  
3 media, and then surface binding quantified. For the internalization assay, cells were incubated  
4 with 1nM conjugates for 30 min or 2 h, for 3T3-TrkA and 3T3-p75<sup>NTR</sup> respectively at 37°C. Cells  
5 were washed, then subjected to imaging.

#### 6 **Pull down assay:**

7 The recombinant protein, Fc-75<sup>NTR</sup> ECD (extracellular domain) was a kind gift from Dr.  
8 Sung Ok Yoon, the Ohio State University. 5 µl of supernant from insect lysate expressing Fc-  
9 p75<sup>NTR</sup> was incubated with a range of either wtNGF or NGF<sup>R100W</sup> (0~10ng) for overnight at 4°C.  
10 Avidin-agarose beads (20 µl) were added/incubated for 2 hrs at 4°C. Beads were washed, boiled  
11 with protein sample buffer and subjected to SDS-PAGE. Western blotting was performed using  
12 the function blocking antibodies against the extracellular domain of p75<sup>NTR</sup> (REX) (Mischel et al.,  
13 2001).

#### 14 **DRG culture, live cell imaging and data analysis:**

15 Embryonic dorsal root ganglions (DRGs E15-16) were isolated from Sprague-Dawley as  
16 described in (Cui et al., 2007; Wu et al., 2007; Sung et al., 2011) with some minor modifications.  
17 Cells were maintained with alternation between growth media (MEM media containing 10% heat  
18 inactivated FBS and 100 ng/ml of NGF) and selection media (MEM media containing 0.5-1 µM of  
19 cytosine β-d-arabinofuranoside (Sigma: C1768), and 100 ng/ml NGF) every two days.

20 For survival analysis, only the cells with round and transparent cell bodies were counted  
21 as DRG neurons to exclude possible fibroblasts populations. In phase-contrast image, the cell  
22 bodies of DRGs look whitish and transparent whereas fibroblasts have black and flattened shaped  
23 cell bodies.

24 For live cell imaging, dissociated DRGs were cultured in microfluidic chambers for 7–10  
25 days (Cui et al., 2007). The microfluidic chambers, manufactured in house, were plated onto 24  
26 mm × 48 mm glass coverslips that were pre-coated with poly-l-lysine (Sigma, P8920) as described  
27 in (Taylor et al., 2006). Dissociated DRG neurons were plated into the cell body chamber. The  
28 growth/selection scheme outlined above was repeated. Axons from the DRG neurons started to  
29 cross the microgrooves after 3 days and reached the axonal chamber in another 7–8 days. Prior  
30 to live imaging of axonal transport of NGF, all compartments (cell body and axonal chambers) of  
31 the DRG neurons were thoroughly rinsed and were depleted of NGF in NGF-free, serum-free  
32 MEM media for 3 h. NGF-QD605 was prepared following the protocol described above. NGF-  
33 QD605 was added to a final concentration of 0.2 nM to the axonal chambers for 2 h at 37°C. Live  
34 cell imaging of NGF-QD605 transport with the axons was carried out using a modified inverted

1 microscope (Nikon TE300) for pseudo-TIRF illumination (Zhang et al., 2010). The microscope  
2 stage was equipped to maintain a constant temperature (37°C). CO<sub>2</sub> level (5%) was maintained  
3 by using CO<sub>2</sub> independent medium (Invitrogen, #18045-088) during live imaging. The laser beam  
4 of 532 nm was used and penetrated ~ 1 μm into aqueous solution at an incident angle.  
5 Fluorescence emission was filtered with QD605/20 emission filter (Chroma Technology,  
6 Rockingham, VT). Time-lapse images were acquired at the speed of 10 frames/s and were  
7 captured using an EMCCD camera (Cascade 512B, Photometric, Tucson, AZ). All data was  
8 processed and analyzed using a MATLAB software pipeline.

9 **Single Cell Patch Clamp:** All recordings were obtained from small to medium diameter sized  
10 cells from cultured DRGs at room temperature. One electrode whole-cell voltage-clamp recording  
11 was performed using Axopatch-1D amplifiers (Axon Instruments). 2-5 MW sized patch electrode  
12 and puffing pipette were used. All cells were clamped at -60 mV holding potential to measure low  
13 pH-evoked current.

14 Standard external solution containing 145mM NaCl, 5mM KCl, 2mM CaCl<sub>2</sub>, 1mM MgCl<sub>2</sub>,  
15 10mM HEPES, and 10 mM glucose (adjusted to pH 7.4 with NaOH) was used to incubate DRG  
16 neurons. To block possible synaptic transmission via activation of ionotropic receptors, 1mM TTX,  
17 10mM CNQX, 50mM AP5, and 50mM picrotoxin were added to the bath. Internal recording  
18 solution contained 130mM K-gluconate, 10mM HEPES, 0.6mM EGTA, 5mM KCl, and 2.5mM Mg-  
19 ATP (adjusted to pH 7.3 with KOH). Low pH puffing solution was made from external solution  
20 and was adjusted to pH 5.5 by adding 1N HCl.

21 Cells were starved for 2 hrs with MEM prior to recording. To evoke low pH response, pH  
22 5.5 external solution was applied briefly through an additional glass pipette placed 50 mm away  
23 from the recorded cell and by a Picospritzer (5-10 psi, for 50-100 ms, Picospritzer II, General  
24 Valve). The responses seen at this configuration were not evoked by mechanical stimulation due  
25 to air puffing as when neutral pH solution was used, so no response was observed. wtNGF or  
26 NGF<sup>R100W</sup>, at a concentration of 50 ng/ml was applied directly to the bath and incubated for 10  
27 min followed by low pH puffing. Data analysis was done in pClamp (Molecular devices) by  
28 calculating the charge transfer for 100 ms and normalized by computing the ratio of response  
29 after NGF/response before NGF.

30

### 31 **Antibodies and SDS-PAGE/blotting:**

32 Standard protocols were followed for SDS-PAGE and blotting. Rabbit anti-pro-NGF IgGs  
33 were a generous gift of Dr. B. L. Hempstead of Cornell University. Rabbit anti-NGF IgGs were  
34 from Santa Cruz Biotechnology Inc (Santa Cruz, CA, Cat# sc-549). Rabbit IgGs against Trk-

1 pTyr490, pErk1/2, total Erk1/2 and p-Cofilin were from Cell Signaling Technology (Danvers, MA,  
2 Cat #9141, 9101, 9102, 3311 respectively). Mouse IgGs against pJNK, mouse IgGs against total  
3 PLC- $\gamma$  were from Santa Cruz (sc-6254, sc-7290 respectively), and rabbit IgGs against pPLC- $\gamma$   
4 were from GeneTex (GTX61714). Rabbit functional blocking antibodies against the extracellular  
5 domain of p75<sup>NTR</sup> (REX) (Mischel et al., 2001) was a generous gift of Dr. L. Reichardt of UCSF.  
6 Rabbit monoclonal antibodies against pAkt were from Epitomics Inc (Cat#2214-1). Rabbit anti-  
7 AviTag IgGs were purchased from Genescript (Piscataway, NJ, Cat# A00674).

#### 8 **Immunostaining:**

9 Immunostaining was carried out according published protocols(Weissmiller et al., 2015).  
10 Briefly, PC12<sup>nnr5</sup> cells were cultured on coverslips that were pre-coated with Matrix-gel (BD).  
11 Following serum starvation for 2hr, cells were treated with either 50 ng/ml wtNGF or 50 ng/ml  
12 NGF<sup>R100W</sup>. Cells were then fixed for 10 mins with 4% paraformaldehyde at 37°C and  
13 permeabilized for 15°C at room temperature with 0.1% triton X-100. 3% bovine serum albumin  
14 (BSA) and 5% goat serum in PBS was used for blocking. Then the cells were incubated for  
15 overnight at 4°C with blocking solution containing 1/100 diluted primary antibody, active RhoA  
16 from NewEast Biosciences (Cat# 26904). After washing three times primary antibody with PBS,  
17 and rocking 5 min, the cells were incubated with a 1/800 dilution of Alexa Fluor 488-goat anti-  
18 mouse IgG (from Molecular Probes cat# A1100) for an hour at room temperature with rocking  
19 covered with foil. After three washes with PBS, nuclei were labeled with 1  $\mu$ g/ml Hoechst 33342  
20 (bisBenzimide H 33342 trihydrochloride, Sigma Cat#B2261) for 5 min at room temperature. Cells  
21 were rinsed, air-dried, mounted and examined with a Leica microscopy using a 100x oil objective  
22 lens.

#### 23 **Statistical analysis:**

24 All experiments were repeated at least three times, independently. Statistical analyses of  
25 results and calculation of *p* values were performed using Prism5 (GraphPad Software, La Jolla,  
26 CA). For un-pairwise comparisons, the Student's t-test was used. For multiple comparisons, the  
27 Tukey one way ANOVA test was used.

28

## 1 Results

### 2 1. NGF<sup>R100W</sup> does not elicit acute thermal or mechanical hyperalgesia *in vivo*.

3 Previous studies suggested that the NGF mutation associated with HSAN V disrupted  
4 either the processing of the pro-form (i.e. NGF<sup>R221W</sup>) or secretion of the mature form (NGF<sup>R100W</sup>),  
5 resulting in preferential secretion of the NGF<sup>R221W</sup> (Larsson et al., 2009; Covaceuszach et al.,  
6 2010; Carvalho et al., 2011; Capsoni, 2014). However, these findings and interpretations are  
7 perplexing since HSAN V patients: 1) report no autonomic symptoms (Capsoni, 2014), which  
8 would argue against increased levels of pro-NGF, a p75 ligand that induces death of sympathetic  
9 neurons (Roux and Barker, 2002; Nykjaer et al., 2005; Khodorova et al., 2013); and 2) have intact  
10 mental abilities, arguing against clinically meaningful CNS neuronal loss and dysfunction. To  
11 further explore the binding, signaling and actions of NGF<sup>R100W</sup>, we produced and characterized  
12 the mature form of the protein in HEK293 cells.

13 While superficial sensation in patients homozygous for NGF<sup>R100W</sup> is normal, it is unknown  
14 if this mutant NGF can induce nociceptor sensitization or transition to chronic pain. Therefore, we  
15 measured the behavioral response of adult rats to mechanical stimuli or noxious thermal stimulus  
16 after a single injection of either wtNGF or NGF<sup>R100W</sup>. Proteins were administered intradermally  
17 to the hind paws of adult male Sprague-Dawley rats following published protocols (Taiwo et al.,  
18 1991).

19 We used the Randall-Sellito method to measure mechanical threshold (Randall and Sellitto,  
20 1957). For all experiments, baseline values were measured before the injection of NGF. Previous  
21 Reports showed that 10ng-1µg of injected wtNGF induced significant mechanical hyperalgesia  
22 (Andreev et al., 1995; Malik-Hall et al., 2005). When 200 ng of wtNGF (**Fig 1A, B, C** blue) was  
23 injected to the dorsum of the rat's hind paw, the mechanical nociceptive threshold was reduced  
24 ~25 % compared to baseline (p<0.0001, unpaired t-test, 0m vs 60m/1<sup>st</sup> day) (**Fig 1B, C** blue).  
25 Mechanical hyperalgesia was evident as soon as 15 min and reached the maximum by 1 h, an  
26 effect that lasted for ≥24 h. Hyperalgesia was diminished to ~15% by 5 days (**Fig 1C**). In marked  
27 contrast to wtNGF, injection of 200 ng of NGF<sup>R100W</sup> had no effect on mechanical nociceptive  
28 threshold (**Fig 1B, C** red).

29 We then measured thermal hyperalgesia using the Hargreaves method (Hargreaves et al.,  
30 1988). Intraplantar injection of 600 ng of wtNGF to the hind paw of rats induced thermal  
31 hyperalgesia, as demonstrated by as much as a 34.8 % decrease in nociceptive threshold  
32 (p=0.0186, 0m vs 45m, unpaired t-test) (**Fig 1D, E, F** blue). Acute thermal hyperalgesia was first  
33 observed at 20-30 min after injection with the maximal effect at 45 min followed by a return to  
34 base line (**Fig 1E, F** blue). In contrast, injection of 600 ng of NGF<sup>R100W</sup> did not induce acute

1 thermal hyperalgesia (**Fig 1E, F red**). We conclude that, unlike wtNGF, NGF<sup>R100W</sup> does not induce  
2 acute thermal or mechanical hyperalgesia.

3

## 4 **2. NGF<sup>R100W</sup> induced hyperalgesic priming.**

5 To test if NGF<sup>R100W</sup> could contribute to chronic pain, we took advantage of the  
6 hyperalgesic priming paradigm with the injection of prostaglandin E2 (PGE<sub>2</sub>) (Reichling and  
7 Levine, 2009). Because wtNGF was shown to induce hyperalgesic priming in rats (Ferrari et al.,  
8 2010), we used this model to examine responses to wtNGF and NGF<sup>R100W</sup>. 7 days post injection  
9 of 200ng of either wtNGF or NGF<sup>R100W</sup>, PGE<sub>2</sub> (100 ng/5μl) was injected into the same injection  
10 site into adult rats (**Fig 1G**). If a priming effect for chronic pain is absent, injection of PGE<sub>2</sub> only  
11 induces acute hyperalgesia that disappears by 4hrs (Ferrari et al., 2010; Ferrari et al., 2013;  
12 Ferrari et al., 2015b). However, in the presence of priming, the same dose of PGE<sub>2</sub> induces a  
13 much prolonged hyperalgesia to mechanical stimuli (Aley and Levine, 1999; Reichling and Levine,  
14 2009).

15 As previously reported (Ferrari et al., 2010), intradermal injection of wtNGF (200ng)  
16 induced acute mechanical hyperalgesia that lasted through day 7 (**Fig1H, I**). As before, NGF<sup>R100W</sup>  
17 failed to induce acute mechanical hyperalgesia (**Fig 1H, I**). On the 7<sup>th</sup> day after measuring the  
18 threshold baseline, PGE<sub>2</sub> was injected into the same site as for NGF and the mechanical threshold  
19 was measured at 30 min and 4 hr thereafter. Consistent with previous findings (Aley and Levine,  
20 1999; Ferrari et al., 2010), in animals treated with wtNGF, PGE<sub>2</sub> induced prolonged hyperalgesia  
21 unattenuated at least for 4 hrs (**Fig 1H, I blue**), while in naïve subjects, PGE<sub>2</sub> induced only acute  
22 hyperalgesia at 30 min and the hyperalgesic effect was largely dissipated at 4 hrs (**Fig 1 H, I black,**  
23 naïve). Remarkably, NGF<sup>R100W</sup> was also as potent as wtNGF in inducing priming with prolonged  
24 PGE<sub>2</sub> hyperalgesia, lasting at least 4 hrs (**Fig 1H, I red, NGF<sup>R100W</sup>**). We conclude that NGF<sup>R100W</sup>  
25 retains binding and signaling necessary to induce hyperalgesic priming (**Fig 1 H, I**), despite of its  
26 inability to induce acute hyperalgesia (**Fig 1B,C,E,F**). These findings suggest that studies of  
27 NGF<sup>R100W</sup> may provide insights into mechanisms underlying the nociceptive and trophic functions  
28 of NGF in sensory neurons.

29

## 30 **3. NGF<sup>R100W</sup> does not potentiate low H<sup>+</sup>-evoked response in sensory neurons *in vitro*.**

31 Among the known mechanisms of pain transduction, NGF produces acute hypersensitivity  
32 by potentiating nociceptive ion channels such as the capsaicin receptor (also known as TRPV1)  
33 and acid-sensing ion channels (ASICs) (Qiu et al.; McCleskey and Gold, 1999; Szallasi and  
34 Blumberg, 1999; Chuang et al., 2001; Julius and Basbaum, 2001; Mamet et al., 2003; Yen et al.,



1 2009). ASICs and TRPV1 are proton-gated non-selective cation channels that mediate acid  
2 evoked pain in peripheral sensory neurons (Caterina et al., 2000; Davis et al., 2000; Chen et al.,  
3 2002; Hellwig et al., 2004). We next performed patch clamp to test if NGF<sup>R100W</sup> no longer elicited  
4 nociceptive response at the cellular level in cultured rat E15.5 dorsal root ganglion (DRG) sensory  
5 neurons. At DIC5 (Days-In-Culture), neurons were starved for NGF for 2 hrs. We used a  
6 moderate acidic solution (pH 5.5) to activate ASICs and TRPV1 by puffing the patch-clamped cell  
7 body (**Fig 2A**). Proton-evoked currents were measured before and after a 10 min application of  
8 either wtNGF or NGF<sup>R100W</sup> (**Fig 2B**). The responses were normalized by calculating the ratio of  
9 the "after NGF" value:the "before NGF" value. Consistent with previous studies (Koplas et al.,  
10 1997) (Shu and Mendell, 1999a) (Shu and Mendell, 1999b), an 10 min of wtNGF treatment  
11 produced an acute sensitization, as displayed by a 1.5 fold increase in proton evoked current (**Fig**  
12 **2C**). However, NGF<sup>R100W</sup> did not induce hyper-sensitization (Fig 2C) (wtNGF vs NGF<sup>R100W</sup>;  $p < 0.01$ ;  
13 paired  $t$ -test).

14

#### 15 **4. NGF<sup>R100W</sup> induces differentiation and supports survival of rat E15.5 DRG neurons.**

16 HSAN V patients show reduced responses to painful stimuli but retain normal cognitive  
17 function (Einarsdottir et al., 2004). We thus speculated that NGF<sup>R100W</sup> would sustain trophic  
18 signaling resulting in the differentiation and survival of DRG sensory neurons (Winter et al., 1988;  
19 Wu et al., 2007). To compare the bioactivity of NGF<sup>R100W</sup> with wtNGF, we performed a dose-  
20 response survival assay of DRG neurons for both wtNGF and NGF<sup>R100W</sup> (0, 10, 50, 100ng/ml).  
21 We used E15.5 DRG and measured the number of healthy DRGs at Day 8 in culture after treating  
22 either with wtNGF or NGF<sup>R100W</sup> (**Fig 3A**). At DIC8, Phase contrast images of DRG cultures were  
23 taken and survival were quantitated (**Fig 3B**). Unpaired t-test was performed to compare the  
24 number of healthy DRGs treated with wtNGF or NGF<sup>R100W</sup>. At any concentration of treatment,  
25 NGF<sup>R100W</sup> exerted trophic effect to support the survival of DRGs comparably to wtNGF. As a  
26 control, cultures with no addition of NGF showed significant death (**Fig 3A**). We thus conclude  
27 that NGF<sup>R100W</sup> supports the survival of rat E15.5 DRG neurons and that it does so as effectively  
28 as wtNGF.

29

#### 30 **5. NGF<sup>R100W</sup> binds to and is internalized through TrkA, but p75<sup>NTR</sup>.**

31 NGF binds and signals through TrkA and/or p75<sup>NTR</sup> receptors to effect neuronal function  
32 (Frade and Barde, 1998; Yoon et al., 1998; Sofroniew et al., 2001; Chao, 2003). We then explored  
33 if NGF<sup>R100W</sup> differed from wtNGF in binding and internalization through TrkA and p75<sup>NTR</sup>. We  
34 used a NIH3T3 cell line that stably expresses either TrkA or p75<sup>NTR</sup> (Hempstead et al., 1991;

1 Kaplan et al., 1991; Zhou et al., 1994; Huang et al., 1999) to perform in-cell binding assays.  
2 NGF<sup>R100W</sup> and wtNGF were each labeled with Quantum dots 655 (QD655) before incubating with  
3 either NIH3T3-TrkA-, or NIH3T3-p75<sup>NTR</sup> cells. Saturable binding was demonstrated by  
4 employing a range of NGF concentrations (**Fig 4A, B**). Binding data were fit to a classical  
5 hyperbolic binding curve (one-site binding) using non-linear regression analysis using Prism 6.  
6 The results showed that NGF<sup>R100W</sup> binding to TrkA (K<sub>d</sub> = 2.79 nM) was essentially  
7 indistinguishable from that for wtNGF (K<sub>d</sub> = 2.27 nM) (**Fig 4A**). In contrast, NGF<sup>R100W</sup> showed  
8 minimal binding to p75<sup>NTR</sup> even at concentrations at which wtNGF binding was essentially  
9 saturated (**Fig 4B**).

10 To further confirm that NGF<sup>R100W</sup> binding to p75<sup>NTR</sup> was markedly reduced, we carried out  
11 *in vitro* binding assays for p75<sup>NTR</sup> using the extracellular domain (p75<sup>NTR</sup>-ECD). Either wtNGF or  
12 NGF<sup>R100W</sup> in their biotinylated forms at a final concentration ranging from 0 to 0.25 nM was  
13 incubated with recombinant p75<sup>NTR</sup>-ECD; streptavidin-agarose beads were used to pull-down  
14 p75<sup>NTR</sup>-ECD that bound to biotinylated wtNGF or NGF<sup>R100W</sup>. The levels of p75<sup>NTR</sup>-ECD were  
15 assayed by immunoblotting using the anti-p75<sup>NTR</sup> antibody, REX. **Fig 4C, E** shows that increasing  
16 concentrations of wtNGF resulted in increasing amounts of p75<sup>NTR</sup>-ECD in the pull-down complex.  
17 In contrast, NGF<sup>R100W</sup> failed to pull down detectable p75-ECD even at the highest concentration  
18 (**Fig 4D**). We conclude that the binding affinity of NGF<sup>R100W</sup> for p75<sup>NTR</sup> is markedly reduced with  
19 respect to that for wtNGF; thus, NGF<sup>R100W</sup> fails to bind p75<sup>NTR</sup>.

20 To extend these analyses, we then assayed if wtNGF and NGF<sup>R100W</sup> differed with respect  
21 to TrkA- or p75<sup>NTR</sup> receptor-mediated internalization. Since NGF<sup>R100W</sup> showed reduced or absent  
22 binding to p75<sup>NTR</sup>, NGF<sup>R100W</sup> would also fail to be internalized via p75<sup>NTR</sup>. We performed live cell  
23 imaging using NIH3T3-TrkA or NIH3T3-p75<sup>NTR</sup> expressing cells (Huang et al., 1999). In addition  
24 to wtNGF and NGF<sup>R100W</sup>, we also took advantage of two well-characterized NGF mutants: 1) the  
25 KKE mutant which shows a significant decrease in binding affinity for p75<sup>NTR</sup> but unaltered binding  
26 affinity for TrkA (Ibanez et al., 1992; Mahapatra et al., 2009); 2) the Δ9/13 mutant that poorly  
27 binds to TrkA while maintaining normal binding affinity for p75<sup>NTR</sup> (Hughes et al., 2001).  
28 Accordingly, KKE and Δ 9/13 NGF served as positive controls for binding to TrkA and p75<sup>NTR</sup>,  
29 respectively. We produced monobiotinylated forms of KKE and Δ 9/13 NGF along with wtNGF  
30 and NGF<sup>R100W</sup> to facilitate conjugation to QD655. These QD-655 labeled forms of NGF were  
31 incubated with cells at a final concentration of 0.2 nM at 37°C (30 min for NIH3T3-TrkA cells and  
32 2 hrs for NIH3T3-p75<sup>NTR</sup> cells) to allow for internalization. Incubations were followed by extensive  
33 washing at 4°C in PBS (three times). QD655 signals were captured by live imaging and defined  
34 as internal if the QD signal was found within the perimeter of the cell and at the same focal level

1 as nucleus. As with wtNGF and the KKE mutant, NGF<sup>R100W</sup> was internalized by NIH3T3-TrkA  
2 cells (**Fig 5A**). The process was receptor-mediated since premixing with 100x wtNGF (i.e. not  
3 conjugated to QD 655) eliminated NGF<sup>R100W</sup>-QD655 internalization. The  $\Delta$ 9/13 mutant were not  
4 internalized in NIH3T3-TrkA cells (**Fig 5A, C**). As predicted, NGF<sup>R100W</sup> as well as the KKE mutant  
5 failed to be internalized into NIH3T3-p75<sup>NTR</sup> cells; with both wtNGF and the  $\Delta$ 9/13 mutant, bright  
6 QD signals were detected inside NIH3T3-p75<sup>NTR</sup> cells (**Fig 5B, C**). As a control, non-conjugated  
7 QDs were not detected in either cell lines. These results are further evidence that NGF<sup>R100W</sup> is  
8 similar to wtNGF by binding to TrkA but differs in not binding to p75<sup>NTR</sup>.

## 9 10 **5. NGF<sup>R100W</sup> activates TrkA-mediated signaling pathways but failed to stimulate a p75<sup>NTR</sup>** 11 **downstream effector.**

12 Based on the binding and internalization results, we predicted that NGF<sup>R100W</sup> activated  
13 TrkA-, but not p75<sup>NTR</sup>-mediated signaling pathways. We next determined if wtNGF and NGF<sup>R100W</sup>  
14 activated two main effectors of TrkA downstream signaling cascades: Erk1/2 and Akt using PC12  
15 cells (**Fig 6A**). For this purpose, PC12 was stimulated with 50ng/ml of either wtNGF or NGF<sup>R100W</sup>.  
16 Cells then were lysed and analyzed using immunoblotting. **Fig 6A, B, C** shows that NGF<sup>R100W</sup>  
17 induced phosphorylation of TrkA, Erk1/2 and Akt to the extent comparable to wtNGF. We also  
18 performed semi-quantitative measurement of pTrkA activated by wtNGF or NGF<sup>R100W</sup>. The signals  
19 for pTrkA were normalized against GAPDH (Extended Fig 6-1). We did not detect a significant  
20 difference in pTrkA (Extended Fig 6-1). These findings suggest that NGF<sup>R100W</sup> maintains its ability  
21 to activate TrkA, Erk 1/2, and Akt signaling pathways, which are primarily involved in providing  
22 trophic support for neuronal survival and differentiation.

23 We then assessed whether both wtNGF and NGF<sup>R100W</sup> stimulated two signaling pathways  
24 downstream of p75<sup>NTR</sup> receptors. We investigated if RhoA and Cofilin, two effectors downstream  
25 to p75<sup>NTR</sup> (Yamashita and Tohyama, 2003; Vardouli et al., 2005), were phosphorylated or  
26 activated by wtNGF or NGF<sup>R100W</sup>. Using PC12<sup>nnr5</sup> cells that express p75<sup>NTR</sup> with little or no TrkA  
27 (Loeb and Greene, 1993), we tested if treatment of these cells with either wtNGF or NGF<sup>R100W</sup>  
28 induced phosphorylation of Cofilin (i.e. p-Cofilin) by immunoblotting using an antibody that  
29 specifically recognizes the phosphorylated form of Cofilin. Our results show that Cofilin was  
30 activated when cells are treated by wtNGF. However, the level of phosphorylated Cofilin was  
31 significantly less in cells treated by NGF<sup>R100W</sup> (**Fig 6D, E**). We then assayed for activation of  
32 RhoA, a signaling molecule upstream of Cofilin in the p75<sup>NTR</sup> signaling cascades (Vardouli et al.,  
33 2005). As demonstrated by immunostaining with specific antibody to activated RhoA (i.e.  
34 RhoA<sup>GTP</sup>), RhoA<sup>GTP</sup> exhibited marked activation by wtNGF as evident by strong cytosolic staining

1 **(Fig 6F)**. In contrast, NGF<sup>R100W</sup> resulted in much less activation of RhoA<sup>GTP</sup> with only sparse  
2 speckles of signals in the cytoplasm **(Fig 6F)**. These data further confirm that NGF<sup>R100W</sup> is  
3 ineffective in activating signaling cascades downstream of p75<sup>NTR</sup>.

4 Interestingly, we observed NGF<sup>R100W</sup> was unable to fully induce phosphorylation of PLC- $\gamma$   
5 **(Fig 6G)**. Therefore, we asked whether failure of activation of the p75<sup>NTR</sup> signaling by NGF<sup>R100W</sup>  
6 was responsible for the inability to fully phosphorylate PLC- $\gamma$ . Indeed, there has been evidence  
7 suggesting that activated p75<sup>NTR</sup> downstream effectors positively impact downstream of TrkA  
8 signaling (Ruiz-Arguello et al., 1996; Basanez et al., 1997; Ruiz-Arguello et al., 1998;  
9 Cremesti et al., 2002). For example, others have shown that ceramide-induced changes in  
10 membrane microenvironments facilitates PLC signaling. We therefore speculated that treating  
11 cells with wtNGF under conditions in which p75<sup>NTR</sup> was inhibited would cause a reduction in PLC-  
12  $\gamma$  activation, as shown in the case for NGF<sup>R100W</sup> **(Fig 6H)**. We used PC12 cells to examine if  
13 p75<sup>NTR</sup> inhibition effected on PLC- $\gamma$  by possible crosstalk between p75<sup>NTR</sup> and TrkA. Our results  
14 showed that phosphorylation of PLC- $\gamma$  was decreased when PC12 were pre-treated with a p75<sup>NTR</sup>  
15 inhibitor, TAT-pep5(Head et al., 2009), followed by stimulation with wtNGF (Hasegawa et al.,  
16 2004), as shown in **Fig 6F**. These results suggest that failure of p75<sup>NTR</sup> signaling by NGF<sup>R100W</sup>  
17 leads to failure of PLC- $\gamma$  signaling by as yet unknown mechanisms, even though NGF<sup>R100W</sup>  
18 stimulates other downstream signaling such as Erk1/2 and Akt under TrkA. Taken together,  
19 NGF<sup>R100W</sup> activates most TrkA downstream signaling events but not those mediated by p75.

20

## 21 **6. NGF<sup>R100W</sup> was retrogradely transported in a fashion similar to wtNGF.**

22 Axons feature prominently in facilitating trafficking and signaling of NGF. A possibility  
23 existed that the loss of pain signaling in NGF<sup>R100W</sup> was due to its inability to be effectively  
24 transported retrogradely to the cell soma in sensory neurons. The ability of R100W to induce  
25 priming suggested that it was effectively transported retrograde in axons to engage the cell body  
26 responses that support priming. To test this possibility, we established microfluidic cultures of  
27 dissociated rat embryonic E15.5 DRG neurons. To visualize trafficking of NGF, we conjugated  
28 biotinylated wtNGF or NGF<sup>R100W</sup> with streptavidin-QD605 at 1 NGF dimer: 1 QD605 ratio. This  
29 experimental paradigm was used to track axonal movement of a single NGF dimer by live imaging  
30 to produce highly quantitative results (Sung et al., 2011). wtNGF was retrogradely transported  
31 with an average speed of 1.5  $\mu\text{m}/\text{sec}$  **(Fig 7A)**, which is consistent with previous results (Cui et  
32 al., 2007; Sung et al., 2011). Based on the analysis of more than 100 endosomes/condition, the  
33 average moving speed of NGF<sup>R100W</sup> revealed no marked difference from that of wtNGF **(Fig 7B)**.

1 NGF is known to exhibit a 'go and stop' behavior during transport (Cui et al., 2007; Sung  
2 et al., 2011). Therefore, we tested if the moving speed during the 'go' period differed significantly  
3 between wtNGF and NGF<sup>R100W</sup>. Our results demonstrated that this was not the case (**Fig 7D**).  
4 By superimposing the kymographs of NGF<sup>R100W</sup> onto those wtNGF (**Fig 7C**), our results confirmed  
5 that NGF<sup>R100W</sup> behaved exactly like wtNGF during retrograde transit from the axonal terminal to  
6 the cell body. We thus conclude that the critical function in retrograde axonal transport of NGF in  
7 sensory neurons is preserved in NGF<sup>R100W</sup>.

8

## 9 **7. Study of contribution and TrkA or p75<sup>NTR</sup> to NGF-induced sensitization effect in vivo.**

10 Our findings suggest that NGF<sup>R100W</sup> retained its ability to bind to and activate TrkA while  
11 failing to engage p75<sup>NTR</sup>. Yet when injected into adult rats, NGF<sup>R100W</sup> still induced hyperalgesic  
12 priming without causing acute sensitization of mechanical stimuli. These results raise the  
13 possibility that TrkA and p75<sup>NTR</sup> may play distinct role(s) in NGF-induced hyperalgesia and  
14 hyperalgesic priming. To this end, we used pharmacological reagents to selectively inhibit  
15 signaling downstream of TrkA and/or p75<sup>NTR</sup>: K252a for blocking TrkA activation and GW4869 for  
16 inhibiting neutral sphingomyelinase downstream of p75<sup>NTR</sup>.

17 Vehicles or inhibitors (K252a, GW4869, K252a + GW4869) were injected only once at 5  
18 min prior to NGF injection (**Fig 8A**). We then measured the mechanical nociceptive threshold at  
19 1 hr and 7 days after NGF injection as outlined in the experimental design (**Fig 8A**). K252a  
20 produced a robust reduction (~30%) in NGF hyperalgesia ( $p=0.0001$ ); GW4869 had a small but  
21 insignificant reduction (~7%,  $p=0.0557$ ); combination of K252a with GW4869 caused a ~25%  
22 reduction ( $p<0.0001$ ). Consistent with results in presented Fig 1, NGF-induced hyperalgesia had  
23 returned to baseline nociceptive threshold at Day 7 following NGF treatment, regardless of  
24 inhibitors (**Fig 8A**).

25 We then measured the impact of these inhibitor treatment on priming following injection of  
26 PEG<sub>2</sub> as in Figure 1. Treatment with K252a, GW4869 or both did not significantly change acute  
27 sensitization 30 min following PEG<sub>2</sub> injection (**Fig 8A**). However, at 4 hrs following PEG<sub>2</sub> injection,  
28 K252a and GW4869 each alone produced a moderate reduction PGE<sub>2</sub> hyperalgesia ( $p=0.0076$   
29 for K252a;  $p0.0359$  for GW4869); Strikingly, combination of K252a with GW4869 induced  
30 complete elimination of PGE<sub>2</sub> hyperalgesia ( $p=0.0006$ ) (**Fig 8A**). These results further support  
31 an interaction between TrkA and p75<sup>NTR</sup> in mediating the priming effect by NGF.

32 Since there is discrepancy between NGF<sup>R100W</sup> injection studies (**Fig 1B,C**) versus  
33 GW4869 treatment in inducing acute hypersensitivity (**Fig 8A**), we repeated Randall-Selitto  
34 experiment with higher dosages of GW 4869. We chose two different dosages, 10 $\mu$ g and 1000 $\mu$ g

1 of GW 4869. Previous studies have demonstrated that 11.55 $\mu$ g/injection of GW 4869 was  
2 effective in blocking acute sensitization by NGF(Khodorova et al., 2013, 2017). The 1000 $\mu$ g dose  
3 was to ensure a maximal effect was achieved. As demonstrated in **Fig 8B**, 10  $\mu$ g/injection  
4 appeared to yield a maximal effect; both dosage, 10  $\mu$ g and 1000  $\mu$ g successfully prevented NGF-  
5 induced acute hyperalgesia at 1hr after NGF injection, which is in line with published  
6 studies(Khodorova et al., 2013, 2017) but also from our own studies presented in **Fig 1B,C**. At  
7 1hr after NGF injection, while vehicle injection decreased the mechanical pain threshold about  
8 34.57%, 10 $\mu$ g and 1000 $\mu$ g of GW4869 decreased the threshold about 19.14% ( $p=0.0043$ ) and  
9 17.64% ( $p=0.0303$ ) respectively. (**Fig 8B**). We then measured the priming following injection of  
10 PGE<sub>2</sub> with these two high dosages of GW4869. Both dosages also blocked priming significantly  
11 compared to vehicle treated ( $p=0.0087$  and  $p=0.0043$ ) (**Fig 8B**). These data further confirmed our  
12 result pointing to the loss of p75<sup>NTR</sup> downstream signaling in NGF<sup>R100W</sup> as a mechanism underlying  
13 loss of pain perception. Taken together, these data point to both TrkA and p75<sup>NTR</sup> responsible in  
14 mediating acute hypersensitivity and priming.  
15

## 1 Discussion

2 Studies on a naturally occurring mutation in HSAN V patients, NGF<sup>R100W</sup>, have provided  
3 new insights into NGF-mediation of nociceptor function. Using molecular, cellular, and  
4 biochemical techniques we demonstrated that NGF<sup>R100W</sup> retained the ability to bind and signal  
5 through TrkA receptors and robustly support the trophic status of DRGs. In contrast, NGF<sup>R100W</sup>  
6 failed to bind or activate p75<sup>NTR</sup>. Our *in vivo* studies have demonstrated that inhibition of TrkA  
7 and p75<sup>NTR</sup> signaling, as well as delivery of antisense reagents targeting these receptors, provided  
8 evidence for a role for both receptors in nociceptor regulation. While TrkA activation mediated  
9 acute sensitization and priming, p75<sup>NTR</sup> signaling appeared to contribute only to priming, thereby  
10 augmenting the TrkA response. Remarkably, and in contrast to its ability to induce trophic  
11 responses *via* TrkA, NGF<sup>R100W</sup> induced nociceptor priming but differed from wtNGF by not causing  
12 acute sensitization. These observations are evidence for distinct TrkA signaling pathways  
13 mediating trophic effects and nociceptor function and provide insights into the biology of HSAN V.

14 Consistent with previous results (Covaceuszach et al., 2010; Capsoni et al., 2011), we  
15 confirmed that while NGF<sup>R100W</sup> binding and activation of TrkA is robust, binding and signaling  
16 through p75<sup>NTR</sup> is essentially absent. Important to its ability to prime nociceptors, NGF<sup>R100W</sup> was  
17 internalized at axonal tips of DRG sensory neurons and traveled toward the cell body at the speed  
18 and with the velocity characteristic of wtNGF. Given properties in common with wtNGF, it is  
19 unclear why NGF<sup>R100W</sup> failed to induce acute sensitization. Possibilities include differences with  
20 respect to wtNGF in the structure of the NGF<sup>R100W</sup>/TrkA complex, the structure of the complex in  
21 signaling endosomes, or the downstream partners recruited to these complexes. Furthermore, it  
22 is hard to exclude the possibility that TrkA downstream that is implicated in pain could be  
23 negatively affected by intertwined crosstalk between p75<sup>NTR</sup> and TrkA as shown in partial PLC  
24 gamma activation by NGF<sup>R100W</sup>. It suggests possibility that TrkA downstream that supports trophic  
25 function is retained in NGF<sup>R100W</sup> mutation while p75 downstream and partial TrkA downstream  
26 that affects pain threshold is knocked-down in NGF<sup>R100W</sup>. In any case, it is apparent that  
27 differences must exist for the signaling events that subserve TrkA trophic and its acute effects on  
28 nociceptor sensitization. Further studies to decipher the basis for these differences will benefit  
29 from the ability to compare the signaling properties of NGF<sup>R100W</sup>/TrkA with wtNGF/TrkA.

30 Our data helps to explain the clinical manifestations of NGF<sup>R100W</sup> mutation. Studies of  
31 affected families point to considerable inter-patient variability. Both homozygous and  
32 heterozygous individuals demonstrate orthopedic manifestations, the most frequent of which is  
33 multiple painless fractures, typically in the legs and feet (Einarsdottir et al., 2004; Minde et al.,  
34 2004; Larsson et al., 2009; Capsoni, 2014). Homozygous patients show decreased pain

1 sensation, mainly at the forearms and legs. In contrast, they respond to truncal pain and register  
2 visceral pain. Distal testing of temperature thresholds showed increases in some homozygous  
3 and heterozygous patients. Sensitivity to soft touch, joint position, vibration sensation and visceral  
4 pain are normal. Sural nerve biopsy reveals loss of C and A delta sensory fibers in both  
5 homozygotes and heterozygotes (Minde et al., 2004; Minde, 2006; Minde et al., 2009; Sagafos et  
6 al., 2016). All patients show reduced sensory innervation of skin and reduced sympathetic  
7 innervation of sweat glands, with more marked changes in homozygotes ((Axelsson et al., 2009).  
8 While a decrease in pain is consistent with the inability of NGF<sup>R100W</sup> to induce acute nociceptor  
9 sensitization, the clinical picture is that of a length-dependent sensory and sympathetic  
10 neuropathy. Indeed, this explains best the painless fractures and decreased pain sensation in  
11 distal lower limbs, increased distal thresholds for cold and heat perception, loss of sensory and  
12 sympathetic innervation of skin and preservation of truncal pain. In view of the preservation of  
13 TrkA signaling by NGF<sup>R100W</sup>, the question arises as to how NGF<sup>R100W</sup> causes the syndrome. The  
14 likely cause is failure to secrete the protein in sufficient amounts to support the distal axons of  
15 sensory and sympathetic neurons. NGF is critical for the survival and maintenance of sympathetic  
16 and sensory neurons (Ibanez et al., 1992; Kew et al., 1996; Casaccia-Bonofil et al., 1998;  
17 Sofroniew et al., 2001; Chao, 2003). Decreased secretion of NGF<sup>R100W</sup> as demonstrated in other  
18 studies must be confirmed with human cells expressing the mutant protein (Larsson et al., 2009;  
19 Covaceuszach et al., 2010).

20 A causal link between NGF deficiency in innervated targets and neuronal dysfunction and  
21 degeneration was established during the earliest studies on NGF (Levi-Montalcini and Hamburger,  
22 1951; Cohen and Levi-Montalcini, 1956; Levi-Montalcini and Angeletti, 1961, 1963; Levi-  
23 Montalcini, 1964) and has been shown in studies of the developing and mature nervous system.  
24 Attempts to increase NGF availability in hopes of reducing neurodegeneration (Wilcox and  
25 Johnson, 1988; Apfel et al., 1994; Apfel and Kessler, 1995, 1996; Apfel, 1999a, b; McArthur et  
26 al., 2000; Apfel, 2002; Cattaneo et al., 2008) have failed in part due to NGF dose-limiting pain  
27 (Eriksdotter Jonhagen et al., 1998; Apfel, 2000, 2002). That NGF<sup>R100W</sup> maintains trophic functions  
28 without acutely sensitizing nociceptors has suggested that this isoform of NGF might be used to  
29 provide trophic support without causing pain (Capsoni et al., 2011; Capsoni, 2014). That  
30 NGF<sup>R100W</sup> maintains the ability of wt NGF to prime nociceptors raises the caution that NGF<sup>R100W</sup>  
31 treatment may not avoid fully the pain induced by wild type NGF.

32 Increasing evidence supports that both TrkA- and p75<sup>NTR</sup>-mediated signaling pathways  
33 are intimately involved in NGF-induced hyperalgesia (Nicol and Vasko, 2007). Extensive human  
34 genetic studies strongly support an essential role played by TrkA in pain sensation; mutations in



1 TrkA that result in loss or reduced TrkA activity are associated with congenital insensitivity to pain  
2 with anhidrosis (CIPA) (Indo, 2001, 2002). Additionally, inhibiting of TrkA-mediated signaling  
3 pathways such as Erk1/2 (Aley et al., 2001; Dai et al., 2002), the PI3K/Akt (Zhuang et al., 2004)  
4 and the PLC- $\gamma$  (Chuang et al., 2001) has been shown to block NGF-induced sensitization, both *in*  
5 *vivo* and *in vitro*. Consistent with these findings, we used specific antisense oligos to attenuate  
6 expression of TrkA *via* intrathecal administration or administered K252a to inhibit TrkA activation  
7 via acute intraplantar injection. Both approaches affirmed that TrkA is required for both the acute  
8 and chronic phase of sensitization induced by NGF.

9 Unlike TrkA, a role for p75<sup>NTR</sup> in NGF-induced hyperalgesia has been implicated largely  
10 by indirect evidence: 1) intrathecal administration of anti-p75<sup>NTR</sup> into animals reduced temperature  
11 hyperalgesia and mechanical allodynia after nerve injury (Obata et al., 2006); 2) direct application  
12 of an p75<sup>NTR</sup> antibody to a crushed sciatic nerve suppressed mechanical allodynia (Fukui et al.,  
13 2010); 3) pretreatment with a p75<sup>NTR</sup> antibody prevented the increase in the number of action  
14 potentials induced by NGF (Zhang and Nicol, 2004); 4) intraplantar injection of proNGF, which  
15 selectively activates p75<sup>NTR</sup>, and not TrkA, induced hyperalgesia (Khodorova et al., 2013); 5) NGF-  
16 induced sensitization was attenuated by inhibiting p75<sup>NTR</sup>-mediated activation of the  
17 sphingomyelin-ceramide-sphingosine 1 phosphate and the c-JUN kinase pathway (Zhang et al.,  
18 2002; Doya et al., 2005; Obata et al., 2006; Zhang et al., 2006; Khodorova et al., 2013).

19 We confirmed a role for p75<sup>NTR</sup> in acute sensitization of mechanical nociceptors by using  
20 GW4869. However, a discrepancy exists between priming studies of NGF<sup>R100W</sup> in Fig 1 versus  
21 GW4869 in Fig 8A; NGF<sup>R100W</sup> induced a priming effect comparably to wtNGF, while GW4869  
22 failed to block the priming effect by wtNGF even at higher dosages (Fig 8B). This could be  
23 explained by the lack of specificity of GW4869 in blocking neutral SMase2 (Canals et al., 2011).  
24 GW4869 specificity issue was also raised in the literatures showing that GW4869 not only block  
25 SMase but also PLC, PP2A (Luberto et al., 2002). Moreover, previous literature has showed that  
26 GW4869 abrogated NGF mediated TrkA trophic effects on cell viability (Candalija et al., 2014)  
27 suggesting block of nSMase2 could lead partial block of TrkA mediated trophic signaling such as  
28 pAkt (Gills et al., 2012). Given all these, GW4869 effect could not be the same as loss of p75  
29 downstream by NGF<sup>R100W</sup>. This may explain the inconsistency in our data showing incapability of  
30 priming by GW4869 versus the priming capability by NGF<sup>R100W</sup>.

31 We are also aware of the specificity issues associated with the use of K252a inhibitor to  
32 block TrkA. K252a selectivity has been studied in many literatures. For example, K252A is known  
33 to inhibit PKCs, which is also implicated in p75 downstream (Mizuno et al., 1993). Not only  
34 inhibiting TrkA, at certain range of concentration, K252a was also found to act as partial inhibitor

1 of the PDGF receptor (Nye et al., 1992).

2           Given all the caveats associated with the use of inhibitors in our studies, our data suggest  
3 that p75<sup>NTR</sup> plays an important role in NGF-induced pain function(Zhang and Nicol, 2004;  
4 Watanabe et al., 2008; Iwakura et al., 2010; Khodorova et al., 2013, 2017). When p75 inhibition  
5 is combined with TrkA suppression, both acute response and priming resulted in a greater  
6 reduction in NGF-mediated hyperalgesic priming. These results support a role for p75<sup>NTR</sup> that is  
7 most evident in its ability to synergize with TrkA to mediate NGF-induced hyperalgesic priming.  
8 Therefore, the nociceptive functions of NGF include contributions from both TrkA and/or p75<sup>NTR</sup>.

9           To avoid the pitfalls associated with the use of inhibitors for TrkA or p75<sup>NTR</sup>-signaling  
10 pathways, future studies using novel genetic models are needed to further dissect the  
11 contributions of TrkA and p75<sup>NTR</sup> to NGF-induced sensitization. For example, TrkA activity can  
12 be specifically inhibited by injection of nanomolar concentrations of derivatives of the general  
13 kinase inhibitor PP1(1NMPP1 or 1NaPP1) to block NGF signaling in TrkA(F592A)-knock in mice  
14 (Chen et al., 2005). Ablation of p75<sup>NTR</sup> can be induced in a conditional p75<sup>NTR</sup> knockout mice  
15 (Bogenmann et al., 2011; Wehner et al., 2016). Use of these models is expected to further clarify  
16 the contributions of TrkA and p75<sup>NTR</sup>, and the possibility that their signaling pathways interact to  
17 effect NGF-induced sensitization.

18

1 **Acknowledgement:** We would like to thank Pauline Hu for assistance in DRG cultures, Dr.  
2 Chihye Chung for assisting with the single cell patch clamp experiments, Ms. R. Shibata and N.  
3 D. Storslett for their assistance in protein purification. Funding supports are from NIH (PN2  
4 EY016525), Down Syndrome Research and Treatment Foundation, Larry L. Hillblom Foundation,  
5 Alzheimer's Association, Thrasher Research Fund (WCM); NIH UCSD ADRC P50 Pilot grant,  
6 Larry L. Hillblom Foundation startup grant, Tauopathy Foundation (CW) and R01 NS084545  
7 (JDL); NIH UCSD T32 Neuroplasticity of Aging Training Grant (KS).

8

9 **Author Contributions:** KS, LFF, WY, XZ, KZ, MLP, MTM and CW performed the experiments;  
10 KN contributed to KKE and 9/13 constructs; KS, BC, WCM, JDL and CW wrote the manuscript.

11

12 **Potential conflict of Interest statement:** Nothing to report.

13

1 **Figure legends**

2

3 **Figure 1. NGF<sup>R100W</sup> does not induce acute sensitization in adult rats.**

4 **Mechanical hyperalgesia (A, B, C).** The Randall-Selitto method was used to measure  
5 mechanical hyperalgesia in adult rats. Following intradermal injection of 200 ng of wtNGF (n=6)  
6 or NGF<sup>R100W</sup> (n=6) into the rat's hind paws mechanical threshold was measured at indicated times.  
7 A significant decrease in mechanical nociceptive threshold in rats injected with wtNGF was seen  
8 within 15 min, maximum by 1 hr and of duration at least 5 days. In contrast, NGF<sup>R100W</sup> did not  
9 produce a significant decrease in the threshold during the 5 days period.

10 **Thermal hyperalgesia (D, E, F).** The Hargreaves test was used to measure thermal  
11 hyperalgesia. Baseline response was first measured for each test animals before NGF injection.  
12 Hindpaws were injected with 600 ng of either wtNGF or NGF<sup>R100W</sup>. Thermal threshold was  
13 measured at indicated times. Animals that were injected with wtNGF showed a significant  
14 decrease at 30 min. The decrease was dissipated after an hour. NGF<sup>R100W</sup> failed to reduce  
15 thermal nociceptive threshold during the entire 1-hour test period. Six rats for each group (n=6)  
16 were used in the test.

17 Unpaired t-test were performed against the baselines within each NGF injection group to  
18 produce p-values. Comparisons were done between the threshold before injection with either  
19 wtNGF or NGF<sup>R100W</sup> to produce p-values that were noted in the figure. \*\*\* indicates when p<0.001

20 **PGE<sub>2</sub>-hyperalgesic priming effect (G, H, I).** On the 7<sup>th</sup> day after NGF administration,  
21 PGE<sub>2</sub> (prostaglandin E<sub>2</sub>) was injected intradermally (100 ng/5μl) to test hyperalgesic priming.  
22 Naïve rats (non-treated with NGF) are shown as a control. Naïve animals showed acute  
23 hyperalgesia within 30 min, but not at 4hrs, after PGE<sub>2</sub> injection. Rats pretreated with intradermal  
24 injection of wtNGF showed decrease in mechanical nociceptive threshold after PGE<sub>2</sub> injection at  
25 30 min, like the controls, but which lasted longer than 4 hr in contrast to naïve animal. Rats  
26 pretreated with NGF<sup>R100W</sup> showed significant decrease in mechanical nociception after PGE<sub>2</sub>  
27 injection, which lasted at least 4 hours comparably to wtNGF. Data are presented as mean ±  
28 SEM. Unpaired t-tests were performed versus values at 'before PGE<sub>2</sub> injection'. \*\*\* indicates  
29 when p<0.001 Six paws (n=6) were used for wtNGF or NGF<sup>R100W</sup>.

30

31 **Figure 2. Low H<sup>+</sup>-evoked response by single cell patch clamping.**

32 Rat E15.5 DRG neurons were cultured as described in the Materials and Methods. At DIC5, DRG  
33 neurons were deprived of NGF for 2 hrs. In **A**, a phase-contrast image of DRG neurons (under  
34 60x magnification) shows the experimental setup. The patch pipette approached from the left,

1 while another glass pipette that applied brief puffs of pH 5.5 solution to the nearby cell body was  
2 placed at a distance. This pipette did not induce mechanical responses. **B:** Whole cell patch-  
3 clamp was performed at a holding potential of -60 mV in DRG. The proton-evoked response was  
4 measured following a brief application of moderate acidic solution of pH 5.5 (blue arrow) onto cell  
5 body to induce inward current (designated as “before NGF response”). 50 ng/ml of wtNGF or  
6 NGF<sup>R100W</sup> (green arrow) was then applied to the bath solution for 10 min, three additional puffs  
7 were applied to record ‘after NGF’ response. The data was normalized by calculating ‘after NGF’  
8 response/ ‘before NGF’ response and presented in **C**. Bar graphs represent mean ± SEM. wtNGF  
9 sensitized the inward current by 1.45 fold, but not NGF<sup>R100W</sup> (p=0.0096; wtNGF versus NGF<sup>R100W</sup>;  
10 unpaired t-test).

11

### 12 **Figure 3. Dorsal root ganglion survival assays.**

13 Rat E15.5 DRG neurons were cultured as described in the Materials and Methods. Parallel  
14 cultures were supplied with either wtNGF or NGF<sup>R100W</sup> with range from 0 ng/ml to 100 ng/ml.  
15 Phase-contrast images of DRG neurons at DIV 8 were captured and representative images are  
16 shown (**A**). Negative control (no NGF, 0 ng/ml) failed to maintain the survival of DRGs. NGF<sup>R100W</sup>  
17 maintained the survival as potently as wtNGF. (**B**) The survival rate of DRG neurons i.e. cell  
18 counts, by wtNGF or NGF<sup>R100W</sup> was not significantly different. (**E**) Unpaired t-test was performed  
19 on wtNGF versus NGF<sup>R100W</sup> (p>0.9999 at 0, 10, 50 ng/ml, p=0.4000 at 100 ng/ml).

20

### 21 **Figure 4. Classical hyperbolic saturation curves of wtNGF and NGF<sup>R100W</sup> bound to TrkA or** 22 **p75<sup>NTR</sup>-expressing NIH3T3 cells.**

23 Either NIH3T3 TrkA or p75<sup>NTR</sup> cells were exposed to wtNGF-QD655/or NGF<sup>R100W</sup>-QD655  
24 for 20-30 min at 20°C with range of different NGF-QD655 concentrations (**A, B**). Non-linear  
25 regression analysis using observed data was performed to examine the binding of NGF to the  
26 TrkA receptor (**A**) or p75<sup>NTR</sup> (**B**). Blue squares and red circles represent surface-bound wtNGF  
27 and NGF<sup>R100W</sup>, respectively. Biotinylated wtNGF (**C**) or NGF<sup>R100W</sup> (**D**) was incubated with  
28 recombinant extracellular domain of p75<sup>NTR</sup> at 4°C for 2 hrs. The complex that contained  
29 biotinylated NGF was pulled-down using streptavidin-agarose (SA) beads at 4°C for 2 hrs. The  
30 beads were washed and boiled in SDS sample buffer. Both an aliquot of the supernatant (control)  
31 and the bead-bound samples were analyzed by Western blotting using a specific antibody against  
32 p75<sup>NTR</sup>(REX). Representative blot shows p75<sup>NTR</sup> bound to wtNGF-SA beads (**C**) and p75<sup>NTR</sup>  
33 bound to NGF<sup>R100W</sup>-SA beads (**D**). Relative REX signal from pulled-down beads was significantly  
34 increased with increased amount of wtNGF as shown in (**C**). ANOVA analysis was performed

1 among different amount of wtNGF suggesting pulled down p75 ECD were significantly increased  
2 according to the increased amount of wtNGF (E) ( $F_{(4,5)}=44.41$ ,  $p=0.0004$ ). In contrast, pulled down  
3 p75 ECD was not detectable even with 10 ngf of NGF<sup>R100W</sup>, only showed the level of baseline Rex  
4 signal intensity (F).

5

6 **Figure 5. Imaging analysis of binding and internalization into NIH3T3-TrkA or -p75<sup>NTR</sup>**  
7 **expressing cells.**

8 **A:** NIH3T3-TrkA cells were cultured on coverslips that were precoated with poly-L-lysine.  
9 Cells were rinsed and serum-starved for 2 hrs. Cells were then incubated with 0.2 nM of wtNGF-,  
10 or NGF<sup>R100W</sup>-, or KKE- or delta9/13-QD655-conjugates, or with QD655 alone for 30 min at 37°C.  
11 Following extensive rinses, QD655 signals were captured by live cell imaging. Representative  
12 images are shown. wtNGF, NGF<sup>R100W</sup> and the KKE mutant that were used as positive controls  
13 for the TrkA receptor showed bright QD655 signals inside the cells. To ensure that internalization  
14 of NGF<sup>R100W</sup> was receptor-mediated, we premixed NGF<sup>R100W</sup> with 100 folds of unlabeled NGF prior  
15 to live imaging. The results show little internalization of NGF<sup>R100W</sup>, indicating the internalization of  
16 NGF<sup>R100W</sup> into NIH3T3-TrkA cells was TrkA specific. **B:** Similarly, NIH3T3-p75<sup>NTR</sup> cells were used  
17 to investigate internalization of the different forms of NGF proteins and representative images are  
18 shown after incubating with NGF-QD655 for 2 hrs at 37°C. The results show that both wtNGF  
19 and Δ9/13, that are known to bind to the p75<sup>NTR</sup> receptor, were internalized into NIH3T3-p75<sup>NTR</sup>  
20 cells and the QD655 signals were mostly concentrated around the peripheries of the cell. No  
21 signals were observed in the NIH3T3-p75<sup>NTR</sup> cells when treated with either the KKE mutant or  
22 NGF<sup>R100W</sup>. **C:** internalized QD655 within the cells were quantitated.

23

24 **Figure 6. Analysis of TrkA and p75<sup>NTR</sup>-mediated signaling pathways.**

25 **A, B, C:** PC12 cells were serum-starved and were treated with 50ng/ml of either wtNGF  
26 or NGF<sup>R100W</sup> for the indicated time intervals. Cell lysates were analyzed by SDS-PAGE and  
27 immunoblotting with specific antibodies as indicated. Treatment with either wtNGF or NGF<sup>R100W</sup>  
28 induced phosphorylation i.e. activation of TrkA, Erk 1/2, and Akt. The blots were reprobbed for  
29 total Akt or Erk1/2 as loading controls. We also measured the signals for pTrkA activated by  
30 wtNGF or NGF<sup>R100W</sup>. The signals for pTrkA were normalized against GAPDH (Extended Fig 6-1).  
31 **D, E:** Analysis of downstream signaling of p75<sup>NTR</sup> in PC12 nnr5 by immunoblotting. The cells  
32 were prepared, treated and cell lysates analyzed by SDS-PAGE/immunoblotting with specific  
33 antibodies as in **A**. There was a significant reduction in phosphorylation of cofilin by NGF<sup>R100W</sup> as  
34 compared to wtNGF. **F:** Immunostaining of RhoA-GTP in PC12 nnr5. PC12 nnr5 were plated on

1 the coverslip coated by poly-L-lys, starved for 2 hr, treated by either wtNGF or NGF<sup>R100W</sup>, and the  
2 preparations were fixed, permeabilized followed by the protocol. DIC imaged cells, single staining  
3 for active form of RhoA (RhoA-GTP) or double staining for active RhoA and nucleus is shown.  
4 RhoA-GTP staining revealed RhoA activation was stronger in the cell treated with wtNGF than  
5 NGF<sup>R100W</sup>. **G, H:** Analysis of PLC- $\gamma$  signaling in PC12 cells by immunoblotting. **G** showed PLC- $\gamma$   
6 stimulated by NGFR100W significantly differ from the one by wtNGF. In contrast, the same lysate  
7 showed similar amount of activation of Erk1/2 and Akt. PC12 cells were pretreated with the p75<sup>NTR</sup>  
8 inhibitor Pep15 followed by treatment with 50 ng/ml NGF. In parallel samples, cells were treated  
9 with either vehicle, or 50 ng/ml with NGF or 50 ng/ml NGF<sup>R100W</sup>. Cell lysates were analyzed by  
10 SDS-PAGE/immunoblotting with specific antibodies as indicated. The data show that activation of  
11 PLC- $\gamma$  was markedly suppressed by NGF<sup>R100W</sup> compared to wtNGF. wtNGF failed to fully activate  
12 PLC- $\gamma$  when p75<sup>NTR</sup> is functionally inhibited, similar to partially activated PLC- $\gamma$  when treated by  
13 NGF<sup>R100W</sup>.

14

#### 15 **Figure 7. Analysis of retrograde axonal transport by live imaging.**

16 **A, B:** rat E15.5 DRG neurons were cultured in microfluidic chamber. Kymographs of  
17 axonal movement of wtNGF and NGF<sup>R100W</sup> based on real-time imaging series of axonal transport  
18 assays. The graphs represent spatial position of QD605 signals (in  $\mu\text{m}$ ) over time (seconds). The  
19 results for both wtNGF and NGF<sup>R100W</sup> showed similar slopes, suggesting NGF<sup>R100W</sup> moves at a  
20 speed within the axon similar to that of wtNGF. **(C)** Overlaid kymographs of displacement of  
21 axonal QD605 signals for wtNGF and NGF<sup>R100W</sup>. 100-150 QD605 signals for either wtNGF (blue)  
22 or NGF<sup>R100W</sup> (red) were analyzed and superimposed. The results demonstrate that axonal  
23 movement of wtNGF and NGF<sup>R100W</sup> behaves in a strikingly similar fashion. **(D)** The total average  
24 transport speeds including pausing for wtNGF and NGF<sup>R100W</sup> were calculated to be 1.5 mm/s and  
25 1.4 mm/s, respectively. The moving velocity without pausing i.e. during the "go" motion period  
26 was 1.7 mm/s for both wtNGF and NGF<sup>R100W</sup>.

27

#### 28 **Figure 8. Role of TrkA and p75<sup>NTR</sup> in nociceptive response and hyperalgesic priming.**

29 **A:** 5  $\mu\text{l}$  (1  $\mu\text{g}$ ) of K252a, GW4869 or vehicle (10% DMSO) were administered intradermally  
30 on the dorsum of the hind paw of adult rats at the same site where NGF was going to be injected.  
31 Flowing NGF injection (200 ng of wtNGF), the Randall-Selitto method was used to measure  
32 mechanical hyperalgesia as in A. n=4 for vehicle, K252a, GW4869; n=6 for K252a + GW4869.  
33 Data are presented as mean + SEM. p values were calculated using unpaired t-test. \*\*\* indicates  
34 when p<0.001.

1           **B:** Higher dosages of GW4869, 10 $\mu$ g (n=4) and 1000 $\mu$ g (n=4), were injected intradermally  
2 on the dorsum of the hind paw of adult rats following by NGF injection as in **A**. Same method was  
3 applied to measure mechanical hyperalgesia used as in **A**. Data are presented as mean + SEM.  
4 p values were calculated using unpaired t-test.

5  
6           **Extended Figure Legend (Figure 6-1)**

7  
8           PC12 cells were serum-starved and were treated with 50ng/ml of either wtNGF or  
9 NGF<sup>R100W</sup> for the indicated time intervals. Cell lysates were immunoprecipitated with a rabbit  
10 anti-TrkA antibody (UBI: cat# 06-574, 1 $\mu$ g) and the immunoprecipitates were analyzed by SDS-  
11 PAGE/immunoblotting with a mouse anti-phospho-Tyrosine antibody (Cell Signaling, Cat#9411,  
12 1/200). An aliquot from each lysate was also analyzed by SDS-PAGE/immunoblotting with a  
13 mouse anti-GAPDH antibody (GenTex, GTX627408). The experiments were repeated for at  
14 least three times independently. The signals for pTrkA signals (140 kD) were quantitated using  
15 Bio-Rab ImageLab and were normalized against GAPDH (37 kD). Representative images and  
16 quantitative data are presented.

17  
18  
19



## 1   **References**

- 2
- 3   Aley KO, Levine JD (1999) Role of protein kinase A in the maintenance of inflammatory pain. *J*
- 4       *Neurosci* 19:2181-2186.
- 5   Aley KO, Martin A, McMahon T, Mok J, Levine JD, Messing RO (2001) Nociceptor sensitization
- 6       by extracellular signal-regulated kinases. *J Neurosci* 21:6933-6939.
- 7   Aloe L, Rocco ML, Bianchi P, Manni L (2012) Nerve growth factor: from the early discoveries to
- 8       the potential clinical use. *Journal of Translational Medicine* 10:239.
- 9   Alvarez P, Levine JD (2014) Screening the role of pronociceptive molecules in a rodent model of
- 10       endometriosis pain. *J Pain* 15:726-733.
- 11   Anand P, Terenghi G, Warner G, Kopelman P, Williams-Chestnut RE, Sinicropi DV (1996) The
- 12       role of endogenous nerve growth factor in human diabetic neuropathy. *Nat Med* 2:703-
- 13       707.
- 14   Andreev N, Dimitrieva N, Koltzenburg M, McMahon SB (1995) Peripheral administration of
- 15       nerve growth factor in the adult rat produces a thermal hyperalgesia that requires the
- 16       presence of sympathetic post-ganglionic neurones. *Pain* 63:109-115.
- 17   Apfel SC (1999a) Neurotrophic factors in the therapy of diabetic neuropathy. *Am J Med*
- 18       107:34S-42S.
- 19   Apfel SC (1999b) Neurotrophic factors and diabetic peripheral neuropathy. *Eur Neurol* 41 Suppl
- 20       1:27-34.
- 21   Apfel SC (2000) Neurotrophic factors and pain. *The Clinical journal of pain* 16:S7-11.
- 22   Apfel SC (2002) Nerve growth factor for the treatment of diabetic neuropathy: what went
- 23       wrong, what went right, and what does the future hold? *Int Rev Neurobiol* 50:393-413.
- 24   Apfel SC, Kessler JA (1995) Neurotrophic factors in the therapy of peripheral neuropathy.
- 25       *Baillieres Clin Neurol* 4:593-606.
- 26   Apfel SC, Kessler JA (1996) Neurotrophic factors in the treatment of peripheral neuropathy.
- 27       *Ciba Found Symp* 196:98-108; discussion 108-112.
- 28   Apfel SC, Arezzo JC, Brownlee M, Federoff H, Kessler JA (1994) Nerve growth factor
- 29       administration protects against experimental diabetic sensory neuropathy. *Brain Res*
- 30       634:7-12.
- 31   Apfel SC, Kessler JA, Adornato BT, Litchy WJ, Sanders C, Rask CA (1998) Recombinant human
- 32       nerve growth factor in the treatment of diabetic polyneuropathy. *NGF Study Group.*
- 33       *Neurology* 51:695-702.
- 34   Ashraf S, Bouhana KS, Pheneger J, Andrews SW, Walsh DA (2016) Selective inhibition of
- 35       tropomyosin-receptor-kinase A (TrkA) reduces pain and joint damage in two rat models
- 36       of inflammatory arthritis. *Arthritis Research & Therapy* 18:97.
- 37   Axelsson HE, Minde JK, Sonesson A, Toolanen G, Hogestatt ED, Zygmunt PM (2009) Transient
- 38       receptor potential vanilloid 1, vanilloid 2 and melastatin 8 immunoreactive nerve fibers
- 39       in human skin from individuals with and without Norrbottnian congenital insensitivity to
- 40       pain. *Neuroscience* 162:1322-1332.
- 41   Basanez G, Ruiz-Arguello MB, Alonso A, Goni FM, Karlsson G, Edwards K (1997) Morphological
- 42       changes induced by phospholipase C and by sphingomyelinase on large unilamellar
- 43       vesicles: a cryo-transmission electron microscopy study of liposome fusion. *Biophys J*
- 44       72:2630-2637.

- 1 Bergmann I, Reiter R, Toyka KV, Koltzenburg M (1998) Nerve growth factor evokes hyperalgesia  
2 in mice lacking the low-affinity neurotrophin receptor p75. *Neuroscience letters* 255:87-  
3 90.
- 4 Blesch A, Tuszynski M (1995) Ex vivo gene therapy for Alzheimer's disease and spinal cord  
5 injury. *Clin Neurosci* 3:268-274.
- 6 Bogenmann E, Thomas PS, Li Q, Kim J, Yang LT, Pierchala B, Kaartinen V (2011) Generation of  
7 mice with a conditional allele for the p75(NTR) neurotrophin receptor gene. *Genesis*  
8 49:862-869.
- 9 Bothwell M (1995) Functional interactions of neurotrophins and neurotrophin receptors. *Annu*  
10 *Rev Neurosci* 18:223-253.
- 11 Canals D, Perry DM, Jenkins RW, Hannun YA (2011) Drug targeting of sphingolipid metabolism:  
12 sphingomyelinases and ceramidases. *British journal of pharmacology* 163:694-712.
- 13 Candalija A, Cubi R, Ortega A, Aguilera J, Gil C (2014) Trk receptors need neutral  
14 sphingomyelinase activity to promote cell viability. *FEBS letters* 588:167-174.
- 15 Capsoni S (2014) From genes to pain: nerve growth factor and hereditary sensory and  
16 autonomic neuropathy type V. *The European journal of neuroscience* 39:392-400.
- 17 Capsoni S, Covaceuszach S, Marinelli S, Ceci M, Bernardo A, Minghetti L, Ugolini G, Pavone F,  
18 Cattaneo A (2011) Taking pain out of NGF: a "painless" NGF mutant, linked to hereditary  
19 sensory autonomic neuropathy type V, with full neurotrophic activity. *PLoS One*  
20 6:e17321.
- 21 Carvalho OP, Thornton GK, Hertecant J, Houlden H, Nicholas AK, Cox JJ, Rielly M, Al-Gazali L,  
22 Woods CG (2011) A novel NGF mutation clarifies the molecular mechanism and extends  
23 the phenotypic spectrum of the HSAN5 neuropathy. *J Med Genet* 48:131-135.
- 24 Casaccia-Bonnel P, Kong H, Chao MV (1998) Neurotrophins: the biological paradox of survival  
25 factors eliciting apoptosis. *Cell Death Differ* 5:357-364.
- 26 Caterina MJ, Leffler A, Malmberg AB, Martin WJ, Trafton J, Petersen-Zeitz KR, Koltzenburg M,  
27 Basbaum AI, Julius D (2000) Impaired nociception and pain sensation in mice lacking the  
28 capsaicin receptor. *Science* 288:306-313.
- 29 Cattaneo A, Capsoni S, Paoletti F (2008) Towards non invasive nerve growth factor therapies for  
30 Alzheimer's disease. *J Alzheimers Dis* 15:255-283.
- 31 Chao MV (2003) Neurotrophins and their receptors: a convergence point for many signalling  
32 pathways. *Nat Rev Neurosci* 4:299-309.
- 33 Chao MV, Hempstead BL (1995) p75 and Trk: a two-receptor system. *Trends Neurosci* 18:321-  
34 326.
- 35 Chen CC, Zimmer A, Sun WH, Hall J, Brownstein MJ (2002) A role for ASIC3 in the modulation of  
36 high-intensity pain stimuli. *Proc Natl Acad Sci U S A* 99:8992-8997.
- 37 Chen X, Ye H, Kuruvilla R, Ramanan N, Scangos KW, Zhang C, Johnson NM, England PM, Shokat  
38 KM, Ginty DD (2005) A chemical-genetic approach to studying neurotrophin signaling.  
39 *Neuron* 46:13-21.
- 40 Chuang HH, Prescott ED, Kong H, Shields S, Jordt SE, Basbaum AI, Chao MV, Julius D (2001)  
41 Bradykinin and nerve growth factor release the capsaicin receptor from PtdIns(4,5)P2-  
42 mediated inhibition. *Nature* 411:957-962.

- 1 Cohen S, Levi-Montalcini R (1956) A Nerve Growth-Stimulating Factor Isolated from Snake  
2 Venom. *Proceedings of the National Academy of Sciences of the United States of*  
3 *America* 42:571-574.
- 4 Conover JC, Yancopoulos GD (1997) Neurotrophin regulation of the developing nervous system:  
5 analyses of knockout mice. *Rev Neurosci* 8:13-27.
- 6 Covaceuszach S, Capsoni S, Marinelli S, Pavone F, Ceci M, Ugolini G, Vignone D, Amato G,  
7 Paoletti F, Lamba D, Cattaneo A (2010) In vitro receptor binding properties of a  
8 "painless" NGF mutein, linked to hereditary sensory autonomic neuropathy type V.  
9 *Biochem Biophys Res Commun* 391:824-829.
- 10 Cremesti AE, Goni FM, Kolesnick R (2002) Role of sphingomyelinase and ceramide in modulating  
11 rafts: do biophysical properties determine biologic outcome? *FEBS Lett* 531:47-53.
- 12 Cuello AC, Bruno MA, Allard S, Leon W, Iulita MF (2010) Cholinergic involvement in Alzheimer's  
13 disease. A link with NGF maturation and degradation. *J Mol Neurosci* 40:230-235.
- 14 Cui B, Wu C, Chen L, Ramirez A, Bearer EL, Li WP, Mobley WC, Chu S (2007) One at a time, live  
15 tracking of NGF axonal transport using quantum dots. *Proc Natl Acad Sci U S A*  
16 104:13666-13671.
- 17 Dai Y, Iwata K, Fukuoka T, Kondo E, Tokunaga A, Yamanaka H, Tachibana T, Liu Y, Noguchi K  
18 (2002) Phosphorylation of extracellular signal-regulated kinase in primary afferent  
19 neurons by noxious stimuli and its involvement in peripheral sensitization. *J Neurosci*  
20 22:7737-7745.
- 21 Davis JB, Gray J, Gunthorpe MJ, Hatcher JP, Davey PT, Overend P, Harries MH, Latcham J,  
22 Clapham C, Atkinson K, Hughes SA, Rance K, Grau E, Harper AJ, Pugh PL, Rogers DC,  
23 Bingham S, Randall A, Sheardown SA (2000) Vanilloid receptor-1 is essential for  
24 inflammatory thermal hyperalgesia. *Nature* 405:183-187.
- 25 Dobrowsky RT, Jenkins GM, Hannun YA (1995) Neurotrophins induce sphingomyelin hydrolysis.  
26 Modulation by co-expression of p75NTR with Trk receptors. *The Journal of biological*  
27 *chemistry* 270:22135-22142.
- 28 Dobrowsky RT, Werner MH, Castellino AM, Chao MV, Hannun YA (1994) Activation of the  
29 sphingomyelin cycle through the low-affinity neurotrophin receptor. *Science* 265:1596-  
30 1599.
- 31 Doya H, Ohtori S, Fujitani M, Saito T, Hata K, Ino H, Takahashi K, Moriya H, Yamashita T (2005) c-  
32 Jun N-terminal kinase activation in dorsal root ganglion contributes to pain  
33 hypersensitivity. *Biochem Biophys Res Commun* 335:132-138.
- 34 Einarsdottir E, Carlsson A, Minde J, Toolanen G, Svensson O, Solders G, Holmgren G, Holmberg  
35 D, Holmberg M (2004) A mutation in the nerve growth factor beta gene (NGFB) causes  
36 loss of pain perception. *Hum Mol Genet* 13:799-805.
- 37 Elias KA, Cronin MJ, Stewart TA, Carlsen RC (1998) Peripheral neuropathy in transgenic diabetic  
38 mice: restoration of C-fiber function with human recombinant nerve growth factor.  
39 *Diabetes* 47:1637-1642.
- 40 Eriksson Jonhagen M, Nordberg A, Amberla K, Backman L, Ebendal T, Meyerson B, Olson L,  
41 Seiger, Shigeta M, Theodorsson E, Viitanen M, Winblad B, Wahlund LO (1998)  
42 Intracerebroventricular infusion of nerve growth factor in three patients with  
43 Alzheimer's disease. *Dement Geriatr Cogn Disord* 9:246-257.

- 1 Fang X, Djouhri L, McMullan S, Berry C, Okuse K, Waxman SG, Lawson SN (2005) trkA Is  
2 Expressed in Nociceptive Neurons and Influences Electrophysiological Properties via  
3 Nav1.8 Expression in Rapidly Conducting Nociceptors. *The Journal of Neuroscience*  
4 25:4868.
- 5 Ferrari LF, Bogen O, Levine JD (2010) Nociceptor subpopulations involved in hyperalgesic  
6 priming. *Neuroscience* 165:896-901.
- 7 Ferrari LF, Levine E, Levine JD (2013) Role of a novel nociceptor autocrine mechanism in chronic  
8 pain. *The European journal of neuroscience* 37:1705-1713.
- 9 Ferrari LF, Araldi D, Levine JD (2015a) Distinct terminal and cell body mechanisms in the  
10 nociceptor mediate hyperalgesic priming. *J Neurosci* 35:6107-6116.
- 11 Ferrari LF, Bogen O, Reichling DB, Levine JD (2015b) Accounting for the delay in the transition  
12 from acute to chronic pain: axonal and nuclear mechanisms. *J Neurosci* 35:495-507.
- 13 Frade JM, Barde YA (1998) Nerve growth factor: two receptors, multiple functions. *Bioessays*  
14 20:137-145.
- 15 Fukui Y, Ohtori S, Yamashita M, Yamauchi K, Inoue G, Suzuki M, Orita S, Eguchi Y, Ochiai N,  
16 Kishida S, Takaso M, Wakai K, Hayashi Y, Aoki Y, Takahashi K (2010) Low affinity NGF  
17 receptor (p75 neurotrophin receptor) inhibitory antibody reduces pain behavior and  
18 CGRP expression in DRG in the mouse sciatic nerve crush model. *J Orthop Res* 28:279-  
19 283.
- 20 Gehler S, Gallo G, Veien E, Letourneau PC (2004) p75 neurotrophin receptor signaling regulates  
21 growth cone filopodial dynamics through modulating RhoA activity. *J Neurosci* 24:4363-  
22 4372.
- 23 Gills JJ, Zhang C, Abu-Asab MS, Castillo SS, Marceau C, LoPiccolo J, Kozikowski AP, Tsokos M,  
24 Goldkorn T, Dennis PA (2012) Ceramide mediates nanovesicle shedding and cell death in  
25 response to phosphatidylinositol ether lipid analogs and perifosine. *Cell Death &  
26 Disease* 3:e340.
- 27 Goss JR, Goins WF, Lacomis D, Mata M, Glorioso JC, Fink DJ (2002) Herpes simplex-mediated  
28 gene transfer of nerve growth factor protects against peripheral neuropathy in  
29 streptozotocin-induced diabetes in the mouse. *Diabetes* 51:2227-2232.
- 30 Hargreaves K, Dubner R, Brown F, Flores C, Joris J (1988) A new and sensitive method for  
31 measuring thermal nociception in cutaneous hyperalgesia. *Pain* 32:77-88.
- 32 Harrington AW, Kim JY, Yoon SO (2002) Activation of Rac GTPase by p75 Is Necessary for c-  
33 *jun* N-Terminal Kinase-Mediated Apoptosis. *The Journal of Neuroscience*  
34 22:156-166.
- 35 Hasegawa Y, Yamagishi S, Fujitani M, Yamashita T (2004) p75 neurotrophin receptor signaling in  
36 the nervous system. *Biotechnol Annu Rev* 10:123-149.
- 37 Head BP, Patel HH, Niesman IR, Drummond JC, Roth DM, Patel PM (2009) Inhibition of p75  
38 neurotrophin receptor attenuates isoflurane-mediated neuronal apoptosis in the  
39 neonatal central nervous system. *Anesthesiology* 110:813-825.
- 40 Hefti F (1994) Development of effective therapy for Alzheimer's disease based on neurotrophic  
41 factors. *Neurobiol Aging* 15 Suppl 2:S193-194.
- 42 Hellweg R, Hartung HD (1990) Endogenous levels of nerve growth factor (NGF) are altered in  
43 experimental diabetes mellitus: a possible role for NGF in the pathogenesis of diabetic  
44 neuropathy. *J Neurosci Res* 26:258-267.

- 1 Hellwig N, Plant TD, Janson W, Schafer M, Schultz G, Schaefer M (2004) TRPV1 acts as proton  
2 channel to induce acidification in nociceptive neurons. *The Journal of biological*  
3 *chemistry* 279:34553-34561.
- 4 Hempstead BL, Martin-Zanca D, Kaplan DR, Parada LF, Chao MV (1991) High-affinity NGF  
5 binding requires coexpression of the trk proto-oncogene and the low-affinity NGF  
6 receptor. *Nature* 350:678-683.
- 7 Huang CS, Zhou J, Feng AK, Lynch CC, Klumperman J, DeArmond SJ, Mobley WC (1999) Nerve  
8 growth factor signaling in caveolae-like domains at the plasma membrane. *The Journal*  
9 *of biological chemistry* 274:36707-36714.
- 10 Huang EJ, Reichardt LF (2001) Neurotrophins: Roles in Neuronal Development and Function.  
11 *Annual review of neuroscience* 24:677-736.
- 12 Hughes AL, Messineo-Jones D, Lad SP, Neet KE (2001) Distinction between differentiation, cell  
13 cycle, and apoptosis signals in PC12 cells by the nerve growth factor mutant delta9/13,  
14 which is selective for the p75 neurotrophin receptor. *J Neurosci Res* 63:10-19.
- 15 Ibanez CF, Ebendal T, Barbany G, Murray-Rust J, Blundell TL, Persson H (1992) Disruption of the  
16 low affinity receptor-binding site in NGF allows neuronal survival and differentiation by  
17 binding to the trk gene product. *Cell* 69:329-341.
- 18 Indo Y (2001) Molecular basis of congenital insensitivity to pain with anhidrosis (CIPA):  
19 mutations and polymorphisms in TRKA (NTRK1) gene encoding the receptor tyrosine  
20 kinase for nerve growth factor. *Hum Mutat* 18:462-471.
- 21 Indo Y (2002) Genetics of congenital insensitivity to pain with anhidrosis (CIPA) or hereditary  
22 sensory and autonomic neuropathy type IV. Clinical, biological and molecular aspects of  
23 mutations in TRKA(NTRK1) gene encoding the receptor tyrosine kinase for nerve growth  
24 factor. *Clin Auton Res* 12 Suppl 1:I20-32.
- 25 Iwakura N, Ohtori S, Orita S, Yamashita M, Takahashi K, Kuniyoshi K (2010) Role of low-affinity  
26 nerve growth factor receptor inhibitory antibody in reducing pain behavior and  
27 calcitonin gene-related Peptide expression in a rat model of wrist joint inflammatory  
28 pain. *J Hand Surg Am* 35:267-273.
- 29 Julius D, Basbaum AI (2001) Molecular mechanisms of nociception. *Nature* 413:203-210.
- 30 Kanda T (2009) [Peripheral neuropathy and blood-nerve barrier]. *Rinsho Shinkeigaku* 49:959-  
31 962.
- 32 Kaplan DR, Miller FD (1997) Signal transduction by the neurotrophin receptors. *Curr Opin Cell*  
33 *Biol* 9:213-221.
- 34 Kaplan DR, Hempstead BL, Martin-Zanca D, Chao MV, Parada LF (1991) The trk proto-oncogene  
35 product: a signal transducing receptor for nerve growth factor. *Science* 252:554-558.
- 36 Kew JN, Smith DW, Sofroniew MV (1996) Nerve growth factor withdrawal induces the apoptotic  
37 death of developing septal cholinergic neurons in vitro: protection by cyclic AMP  
38 analogue and high potassium. *Neuroscience* 70:329-339.
- 39 Khodorova A, Nicol GD, Strichartz G (2013) The p75NTR signaling cascade mediates mechanical  
40 hyperalgesia induced by nerve growth factor injected into the rat hind paw.  
41 *Neuroscience* 254:312-323.
- 42 Khodorova A, Nicol GD, Strichartz G (2017) The TrkA receptor mediates experimental thermal  
43 hyperalgesia produced by nerve growth factor: Modulation by the p75 neurotrophin  
44 receptor. *Neuroscience* 340:384-397.

- 1 Knusel B, Gao H (1996) Neurotrophins and Alzheimer's disease: beyond the cholinergic neurons.  
2 Life Sci 58:2019-2027.
- 3 Koliatsos VE (1996) Biological therapies for Alzheimer's disease: focus on trophic factors. Crit  
4 Rev Neurobiol 10:205-238.
- 5 Koplas PA, Rosenberg RL, Oxford GS (1997) The role of calcium in the desensitization of  
6 capsaicin responses in rat dorsal root ganglion neurons. J Neurosci 17:3525-3537.
- 7 Larsson E, Kuma R, Norberg A, Minde J, Holmberg M (2009) Nerve growth factor R221W  
8 responsible for insensitivity to pain is defectively processed and accumulates as proNGF.  
9 Neurobiol Dis 33:221-228.
- 10 Lehmann M, Fournier A, Selles-Navarro I, Dergham P, Sebok A, Leclerc N, Tigyi G, McKerracher L  
11 (1999) Inactivation of Rho signaling pathway promotes CNS axon regeneration. J  
12 Neurosci 19:7537-7547.
- 13 Lein B (1995) Potential therapy for painful neuropathy. PI Perspect:11.
- 14 Levi-Montalcini R (1964) Growth Control of Nerve Cells by a Protein Factor and Its Antiserum:  
15 Discovery of This Factor May Provide New Leads to Understanding of Some  
16 Neurogenetic Processes. Science 143:105-110.
- 17 Levi-Montalcini R, Hamburger V (1951) Selective growth stimulating effects of mouse sarcoma  
18 on the sensory and sympathetic nervous system of the chick embryo. J Exp Zool  
19 116:321-361.
- 20 Levi-Montalcini R, Angeletti PU (1961) Growth control of the sympathetic system by a specific  
21 protein factor. Q Rev Biol 36:99-108.
- 22 Levi-Montalcini R, Angeletti PU (1963) Essential role of the nerve growth factor in the survival  
23 and maintenance of dissociated sensory and sympathetic embryonic nerve cells in vitro.  
24 Dev Biol 6:653-659.
- 25 Lewin GR, Mendell LM (1993) Nerve growth factor and nociception. Trends Neurosci 16:353-  
26 359.
- 27 Lewin GR, Ritter AM, Mendell LM (1993) Nerve growth factor-induced hyperalgesia in the  
28 neonatal and adult rat. J Neurosci 13:2136-2148.
- 29 Li X, Jope RS (1995) Selective inhibition of the expression of signal transduction proteins by  
30 lithium in nerve growth factor-differentiated PC12 cells. J Neurochem 65:2500-2508.
- 31 Loeb DM, Greene LA (1993) Transfection with trk restores "slow" NGF binding, efficient NGF  
32 uptake, and multiple NGF responses to NGF-nonresponsive PC12 cell mutants. J  
33 Neurosci 13:2919-2929.
- 34 Luberto C, Hassler DF, Signorelli P, Okamoto Y, Sawai H, Boros E, Hazen-Martin DJ, Obeid LM,  
35 Hannun YA, Smith GK (2002) Inhibition of tumor necrosis factor-induced cell death in  
36 MCF7 by a novel inhibitor of neutral sphingomyelinase. J Biol Chem 277:41128-41139.
- 37 Mahapatra S, Mehta H, Woo SB, Neet KE (2009) Identification of critical residues within the  
38 conserved and specificity patches of nerve growth factor leading to survival or  
39 differentiation. The Journal of biological chemistry 284:33600-33613.
- 40 Malerba F, Paoletti F, Bruni Ercole B, Materazzi S, Nassini R, Coppi E, Patacchini R, Capsoni S,  
41 Lamba D, Cattaneo A (2015) Functional Characterization of Human ProNGF and NGF  
42 Mutants: Identification of NGF P61SR100E as a "Painless" Lead Investigational Candidate  
43 for Therapeutic Applications. PLoS One 10:e0136425.

- 1 Malik-Hall M, Dina OA, Levine JD (2005) Primary afferent nociceptor mechanisms mediating  
2 NGF-induced mechanical hyperalgesia. *The European journal of neuroscience* 21:3387-  
3 3394.
- 4 Malmberg AB, Yaksh TL (1993) Spinal nitric oxide synthesis inhibition blocks NMDA-induced  
5 thermal hyperalgesia and produces antinociception in the formalin test in rats. *Pain*  
6 54:291-300.
- 7 Mamet J, Lazdunski M, Voilley N (2003) How nerve growth factor drives physiological and  
8 inflammatory expressions of acid-sensing ion channel 3 in sensory neurons. *The Journal*  
9 *of biological chemistry* 278:48907-48913.
- 10 Mantyh PW, Koltzenburg M, Mendell LM, Tive L, Shelton DL (2011) Antagonism of Nerve  
11 Growth Factor-TrkA Signaling and the Relief of Pain. *Anesthesiology* 115:189-204.
- 12 McArthur JC, Yiannoutsos C, Simpson DM, Adornato BT, Singer EJ, Hollander H, Marra C, Rubin  
13 M, Cohen BA, Tucker T, Navia BA, Schifitto G, Katzenstein D, Rask C, Zaborski L, Smith  
14 ME, Shriver S, Millar L, Clifford DB, Karalnik IJ (2000) A phase II trial of nerve growth  
15 factor for sensory neuropathy associated with HIV infection. AIDS Clinical Trials Group  
16 Team 291. *Neurology* 54:1080-1088.
- 17 McCleskey EW, Gold MS (1999) Ion channels of nociception. *Annu Rev Physiol* 61:835-856.
- 18 Minde J, Toolanen G, Andersson T, Nennesmo I, Remahl IN, Svensson O, Solders G (2004)  
19 Familial insensitivity to pain (HSAN V) and a mutation in the NGFB gene. A  
20 neurophysiological and pathological study. *Muscle Nerve* 30:752-760.
- 21 Minde J, Andersson T, Fulford M, Aguirre M, Nennesmo I, Remahl IN, Svensson O, Holmberg M,  
22 Toolanen G, Solders G (2009) A novel NGFB point mutation: a phenotype study of  
23 heterozygous patients. *J Neurol Neurosurg Psychiatry* 80:188-195.
- 24 Minde JK (2006) Norrbottnian congenital insensitivity to pain. *Acta Orthop Suppl* 77:2-32.
- 25 Mischel PS, Smith SG, Vining ER, Valletta JS, Mobley WC, Reichardt LF (2001) The extracellular  
26 domain of p75NTR is necessary to inhibit neurotrophin-3 signaling through TrkA. *The*  
27 *Journal of biological chemistry* 276:11294-11301.
- 28 Mizuno K, Saido TC, Ohno S, Tamaoki T, Suzuki K (1993) Staurosporine-related compounds,  
29 K252a and UCN-01, inhibit both cPKC and nPKC. *FEBS Lett* 330:114-116.
- 30 Mufson EJ, Counts SE, Perez SE, Ginsberg SD (2008) Cholinergic system during the progression  
31 of Alzheimer's disease: therapeutic implications. *Expert Rev Neurother* 8:1703-1718.
- 32 Murakawa Y, Zhang W, Pierson CR, Brismar T, Ostenson CG, Efendic S, Sima AA (2002) Impaired  
33 glucose tolerance and insulinopenia in the GK-rat causes peripheral neuropathy.  
34 *Diabetes Metab Res Rev* 18:473-483.
- 35 Nicol GD, Vasko MR (2007) Unraveling the story of NGF-mediated sensitization of nociceptive  
36 sensory neurons: ON or OFF the Trks? *Mol Interv* 7:26-41.
- 37 Nye SH, Squinto SP, Glass DJ, Stitt TN, Hantzopoulos P, Macchi MJ, Lindsay NS, Ip NY,  
38 Yancopoulos GD (1992) K-252a and staurosporine selectively block autophosphorylation  
39 of neurotrophin receptors and neurotrophin-mediated responses. *Mol Biol Cell* 3:677-  
40 686.
- 41 Nykjaer A, Willnow TE, Petersen CM (2005) p75NTR--live or let die. *Curr Opin Neurobiol* 15:49-  
42 57.

- 1 Obata K, Katsura H, Sakurai J, Kobayashi K, Yamanaka H, Dai Y, Fukuoka T, Noguchi K (2006)  
2       Suppression of the p75 neurotrophin receptor in uninjured sensory neurons reduces  
3       neuropathic pain after nerve injury. *J Neurosci* 26:11974-11986.
- 4 Olson L (1993) NGF and the treatment of Alzheimer's disease. *Exp Neurol* 124:5-15.
- 5 Pradat PF (2003) [Treatment of peripheral neuropathies with neurotrophic factors: animal  
6       models and clinical trials]. *Rev Neurol (Paris)* 159:147-161.
- 7 Qiu CY, Liu YQ, Qiu F, Wu J, Zhou QY, Hu WP Prokineticin 2 potentiates acid-sensing ion channel  
8       activity in rat dorsal root ganglion neurons. *J Neuroinflammation* 9:108.
- 9 Quasthoff S, Hartung HP (2001) [Nerve growth factor (NGF) in treatment of diabetic  
10       polyneuropathy. One hope less?]. *Nervenarzt* 72:456-459.
- 11 Rafii MS, Baumann TL, Bakay RA, Ostrove JM, Siffert J, Fleisher AS, Herzog CD, Barba D, Pay M,  
12       Salmon DP, Chu Y, Kordower JH, Bishop K, Keator D, Potkin S, Bartus RT (2014) A phase1  
13       study of stereotactic gene delivery of AAV2-NGF for Alzheimer's disease. *Alzheimers*  
14       *Dement* 10:571-581.
- 15 Randall LO, Selitto JJ (1957) A method for measurement of analgesic activity on inflamed tissue.  
16       *Arch Int Pharmacodyn Ther* 111:409-419.
- 17 Rask CA (1999) Biological actions of nerve growth factor in the peripheral nervous system. *Eur*  
18       *Neurol* 41 Suppl 1:14-19.
- 19 Reichling DB, Levine JD (2009) Critical role of nociceptor plasticity in chronic pain. *Trends*  
20       *Neurosci* 32:611-618.
- 21 Roux PP, Barker PA (2002) Neurotrophin signaling through the p75 neurotrophin receptor. *Prog*  
22       *Neurobiol* 67:203-233.
- 23 Ruiz-Arguello MB, Goni FM, Alonso A (1998) Vesicle membrane fusion induced by the concerted  
24       activities of sphingomyelinase and phospholipase C. *The Journal of biological chemistry*  
25       273:22977-22982.
- 26 Ruiz-Arguello MB, Basanez G, Goni FM, Alonso A (1996) Different effects of enzyme-generated  
27       ceramides and diacylglycerols in phospholipid membrane fusion and leakage. *The*  
28       *Journal of biological chemistry* 271:26616-26621.
- 29 Sagafos D, Kleggetveit IP, Helas T, Schmidt R, Minde J, Namer B, Schmelz M, Jorum E (2016)  
30       Single-Fiber Recordings of Nociceptive Fibers in Patients With HSAN Type V With  
31       Congenital Insensitivity to Pain. *The Clinical journal of pain* 32:636-642.
- 32 Salehi AH, Roux PP, Kubu CJ, Zeindler C, Bhakar A, Tannis LL, Verdi JM, Barker PA (2000) NRAGE,  
33       a novel MAGE protein, interacts with the p75 neurotrophin receptor and facilitates  
34       nerve growth factor-dependent apoptosis. *Neuron* 27:279-288.
- 35 Schifitto G, Yiannoutsos C, Simpson DM, Adornato BT, Singer EJ, Hollander H, Marra CM, Rubin  
36       M, Cohen BA, Tucker T, Koralnik IJ, Katzenstein D, Haidich B, Smith ME, Shriver S, Millar  
37       L, Clifford DB, McArthur JC (2001) Long-term treatment with recombinant nerve growth  
38       factor for HIV-associated sensory neuropathy. *Neurology* 57:1313-1316.
- 39 Schindowski K, Belarbi K, Buee L (2008) Neurotrophic factors in Alzheimer's disease: role of  
40       axonal transport. *Genes Brain Behav* 7 Suppl 1:43-56.
- 41 Schulte-Herbruggen O, Jockers-Scherubl MC, Hellweg R (2008) Neurotrophins: from  
42       pathophysiology to treatment in Alzheimer's disease. *Curr Alzheimer Res* 5:38-44.
- 43 Scott SA, Crutcher KA (1994) Nerve growth factor and Alzheimer's disease. *Rev Neurosci* 5:179-  
44       211.



- 1 Shu X, Mendell LM (1999a) Nerve growth factor acutely sensitizes the response of adult rat  
2 sensory neurons to capsaicin. *Neurosci Lett* 274:159-162.
- 3 Shu XQ, Mendell LM (1999b) Neurotrophins and hyperalgesia. *Proc Natl Acad Sci U S A* 96:7693-  
4 7696.
- 5 Sofroniew MV, Howe CL, Mobley WC (2001) Nerve growth factor signaling, neuroprotection,  
6 and neural repair. *Annu Rev Neurosci* 24:1217-1281.
- 7 Summer GJ, Puntillo KA, Miaskowski C, Dina OA, Green PG, Levine JD (2006) TrkA and PKC-  
8 epsilon in thermal burn-induced mechanical hyperalgesia in the rat. *J Pain* 7:884-891.
- 9 Sung K, Maloney MT, Yang J, Wu C (2011) A novel method for producing mono-biotinylated,  
10 biologically active neurotrophic factors: an essential reagent for single molecule study of  
11 axonal transport. *J Neurosci Methods* 200:121-128.
- 12 Svendsen CN, Kew JN, Staley K, Sofroniew MV (1994) Death of developing septal cholinergic  
13 neurons following NGF withdrawal in vitro: protection by protein synthesis inhibition. *J*  
14 *Neurosci* 14:75-87.
- 15 Szallasi A, Blumberg PM (1999) Vanilloid (Capsaicin) receptors and mechanisms. *Pharmacol Rev*  
16 51:159-212.
- 17 Taiwo YO, Levine JD, Burch RM, Woo JE, Mobley WC (1991) Hyperalgesia induced in the rat by  
18 the amino-terminal octapeptide of nerve growth factor. *Proc Natl Acad Sci U S A*  
19 88:5144-5148.
- 20 Taylor AM, Rhee SW, Jeon NL (2006) Microfluidic chambers for cell migration and neuroscience  
21 research. *Methods Mol Biol* 321:167-177.
- 22 Tomlinson DR, Fernyhough P, Diemel LT (1996) Neurotrophins and peripheral neuropathy.  
23 *Philos Trans R Soc Lond B Biol Sci* 351:455-462.
- 24 Tuszynski MH, Yang JH, Barba D, et al. (2015) Nerve growth factor gene therapy: Activation of  
25 neuronal responses in alzheimer disease. *JAMA Neurology* 72:1139-1147.
- 26 Unger JW, Klitzsch T, Pera S, Reiter R (1998) Nerve growth factor (NGF) and diabetic neuropathy  
27 in the rat: morphological investigations of the sural nerve, dorsal root ganglion, and  
28 spinal cord. *Exp Neurol* 153:23-34.
- 29 Vardouli L, Moustakas A, Stournaras C (2005) LIM-kinase 2 and cofilin phosphorylation mediate  
30 actin cytoskeleton reorganization induced by transforming growth factor-beta. *The*  
31 *Journal of biological chemistry* 280:11448-11457.
- 32 Walwyn WM, Matsuka Y, Arai D, Bloom DC, Lam H, Tran C, Spigelman I, Maidment NT (2006)  
33 HSV-1-mediated NGF delivery delays nociceptive deficits in a genetic model of diabetic  
34 neuropathy. *Exp Neurol* 198:260-270.
- 35 Watanabe T, Ito T, Inoue G, Ohtori S, Kitajo K, Doya H, Takahashi K, Yamashita T (2008) The p75  
36 receptor is associated with inflammatory thermal hypersensitivity. *J Neurosci Res*  
37 86:3566-3574.
- 38 Wehner AB, Milen AM, Albin RL, Pierchala BA (2016) The p75 neurotrophin receptor augments  
39 survival signaling in the striatum of pre-symptomatic Q175(WT/HD) mice. *Neuroscience*  
40 324:297-306.
- 41 Weissmiller AM, Natera-Naranjo O, Reyna SM, Pearn ML, Zhao X, Nguyen P, Cheng S, Goldstein  
42 LS, Tanzi RE, Wagner SL, Mobley WC, Wu C (2015) A gamma-Secretase Inhibitor, but Not  
43 a gamma-Secretase Modulator, Induced Defects in BDNF Axonal Trafficking and  
44 Signaling: Evidence for a Role for APP. *PLoS One* 10:e0118379.

- 1 Wilcox CL, Johnson EM, Jr. (1988) Characterization of nerve growth factor-dependent herpes  
2 simplex virus latency in neurons in vitro. *J Virol* 62:393-399.
- 3 Williams BJ, Eriksson-Jonhagen M, Granholm AC (2006) Nerve growth factor in treatment  
4 and pathogenesis of Alzheimer's disease. *Prog Neurobiol* 80:114-128.
- 5 Winkler J, Ramirez GA, Kuhn HG, Peterson DA, Day-Lollini PA, Stewart GR, Tuszynski MH, Gage  
6 FH, Thal LJ (1997) Reversible Schwann cell hyperplasia and sprouting of sensory and  
7 sympathetic neurites after intraventricular administration of nerve growth factor. *Ann*  
8 *Neurol* 41:82-93.
- 9 Winter J, Forbes CA, Sternberg J, Lindsay RM (1988) Nerve growth factor (NGF) regulates adult  
10 rat cultured dorsal root ganglion neuron responses to the excitotoxin capsaicin. *Neuron*  
11 1:973-981.
- 12 Wu C, Lai CF, Mobley WC (2001) Nerve growth factor activates persistent Rap1 signaling in  
13 endosomes. *J Neurosci* 21:5406-5416.
- 14 Wu C, Ramirez A, Cui B, Ding J, Delcroix JD, Valletta JS, Liu JJ, Yang Y, Chu S, Mobley WC (2007) A  
15 functional dynein-microtubule network is required for NGF signaling through the  
16 Rap1/MAPK pathway. *Traffic* 8:1503-1520.
- 17 Yamashita T, Tohyama M (2003) The p75 receptor acts as a displacement factor that releases  
18 Rho from Rho-GDI. *Nature neuroscience* 6:461-467.
- 19 Yamashita T, Tucker KL, Barde Y-A (1999) Neurotrophin Binding to the p75 Receptor Modulates  
20 Rho Activity and Axonal Outgrowth. *Neuron* 24:585-593.
- 21 Yen YT, Tu PH, Chen CJ, Lin YW, Hsieh ST, Chen CC (2009) Role of acid-sensing ion channel 3 in  
22 sub-acute-phase inflammation. *Mol Pain* 5:1.
- 23 Yoon SO, Casaccia-Bonnel P, Carter B, Chao MV (1998) Competitive signaling between TrkA  
24 and p75 nerve growth factor receptors determines cell survival. *J Neurosci* 18:3273-  
25 3281.
- 26 Zhang K, Osakada Y, Vrljic M, Chen L, Mudrakola HV, Cui B (2010) Single-molecule imaging of  
27 NGF axonal transport in microfluidic devices. *Lab Chip* 10:2566-2573.
- 28 Zhang YH, Nicol GD (2004) NGF-mediated sensitization of the excitability of rat sensory neurons  
29 is prevented by a blocking antibody to the p75 neurotrophin receptor. *Neurosci Lett*  
30 366:187-192.
- 31 Zhang YH, Vasko MR, Nicol GD (2002) Ceramide, a putative second messenger for nerve growth  
32 factor, modulates the TTX-resistant Na(+) current and delayed rectifier K(+) current in  
33 rat sensory neurons. *J Physiol* 544:385-402.
- 34 Zhang YH, Vasko MR, Nicol GD (2006) Intracellular sphingosine 1-phosphate mediates the  
35 increased excitability produced by nerve growth factor in rat sensory neurons. *J Physiol*  
36 575:101-113.
- 37 Zhou J, Holtzman DM, Weiner RI, Mobley WC (1994) Expression of TrkA confers neuron-like  
38 responsiveness to nerve growth factor on an immortalized hypothalamic cell line. *Proc*  
39 *Natl Acad Sci U S A* 91:3824-3828.
- 40 Zhuang ZY, Xu H, Clapham DE, Ji RR (2004) Phosphatidylinositol 3-kinase activates ERK in  
41 primary sensory neurons and mediates inflammatory heat hyperalgesia through TRPV1  
42 sensitization. *J Neurosci* 24:8300-8309.

43  
44

Fig 1\_Sung et al., 2018

**A:** Experimental design for mechanical test

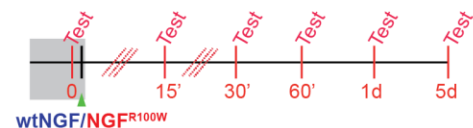

**D:** Experimental design for thermal test

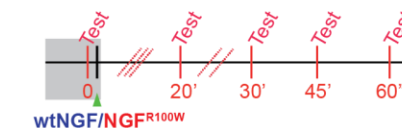

**B:** Mechanical threshold

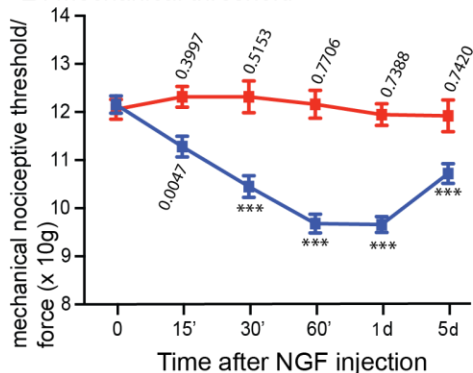

**E:** Thermal threshold

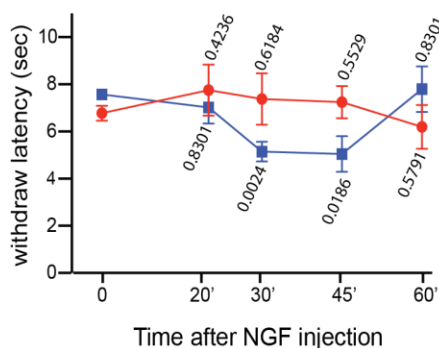

**C:** Reduction in mechanical threshold

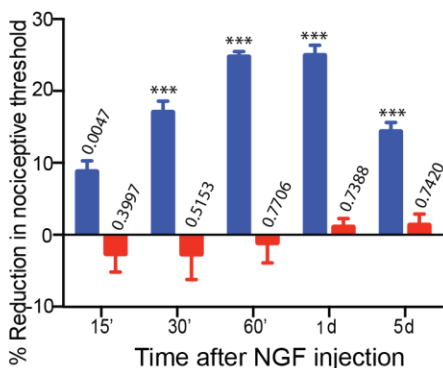

**F:** Reduction in thermal threshold

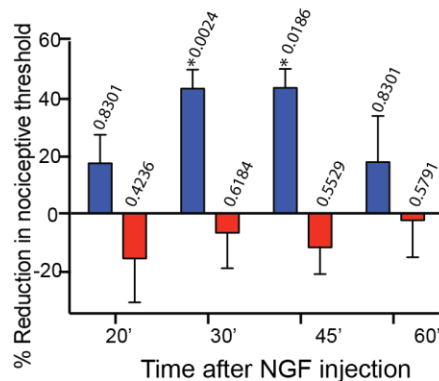

**G:** Experimental design for PGE<sub>2</sub> hyperalgesic priming

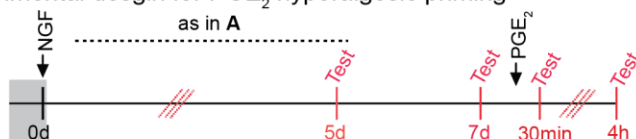

**H:** Mechanical threshold

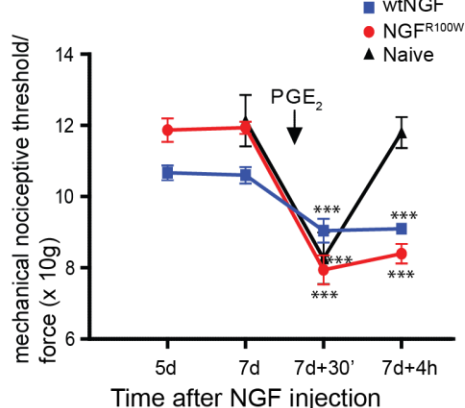

**I:** Reduction in mechanical threshold

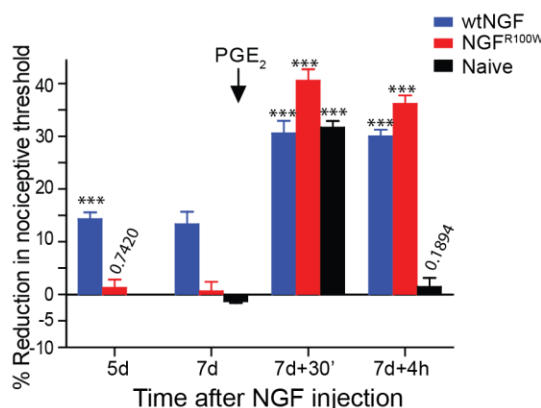

Fig 2. Sung et al., 2018

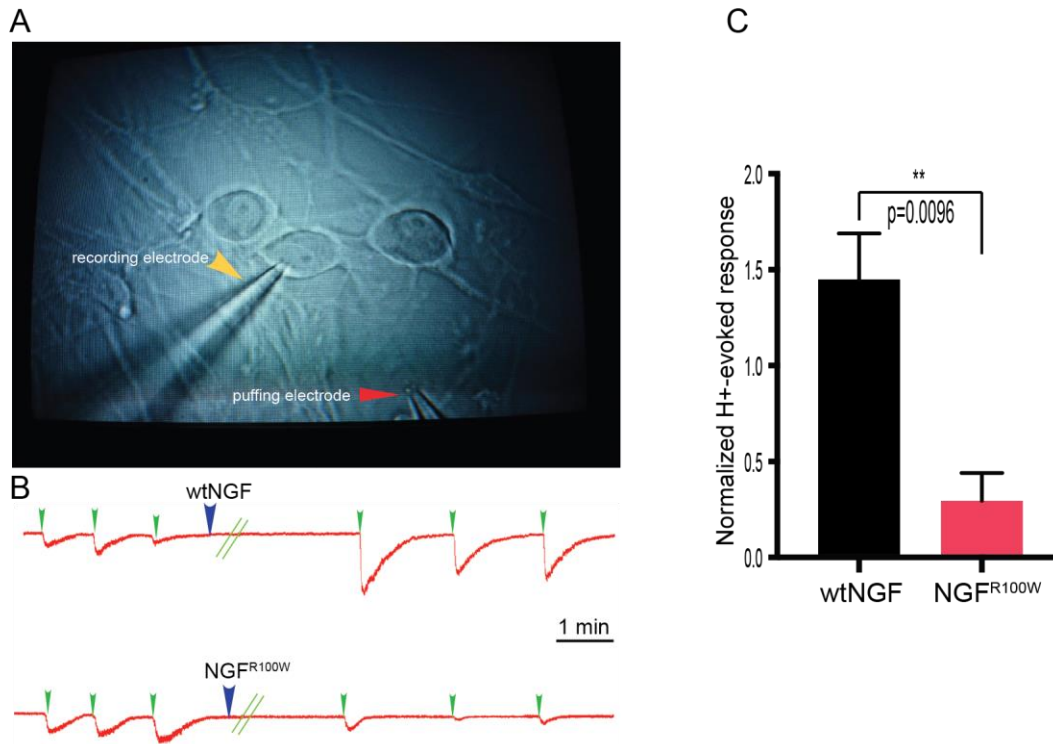

1  
2  
3  
4

Fig 3  
Sung et al., 2018

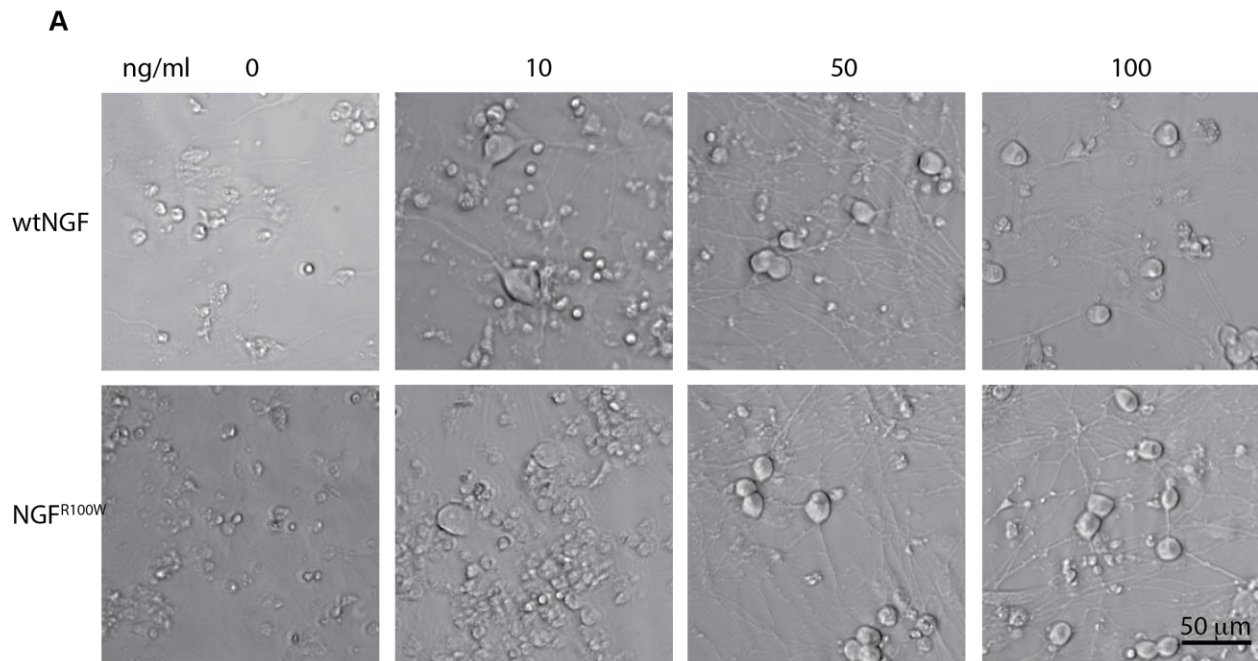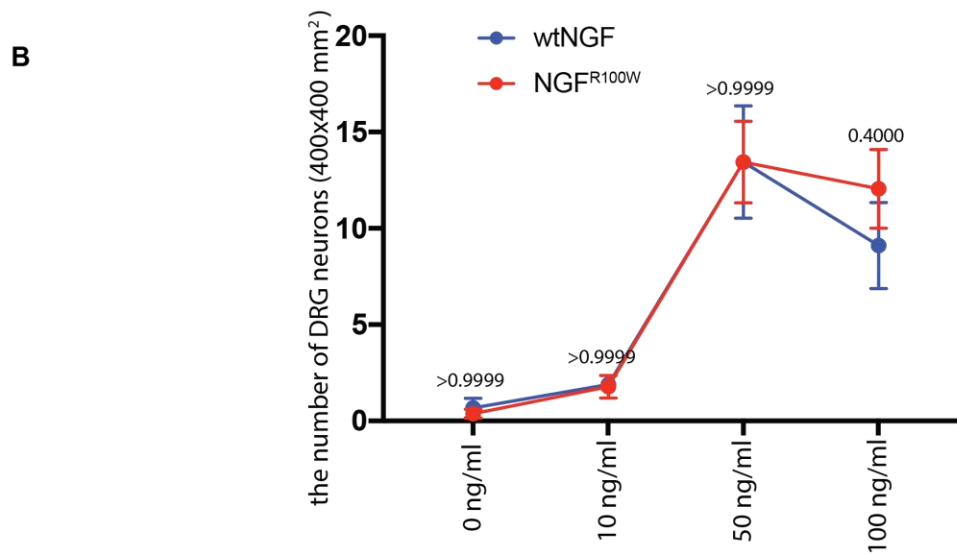

1

Fig 4  
Sung et al., 2018

**A** NIH3T3-TrkA Cells

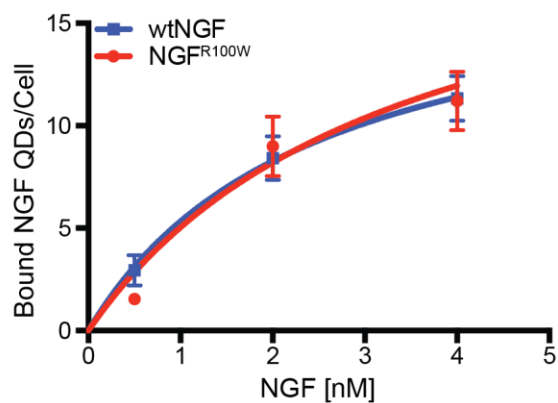

**B** NIH3T3-p75<sup>NTR</sup> cells

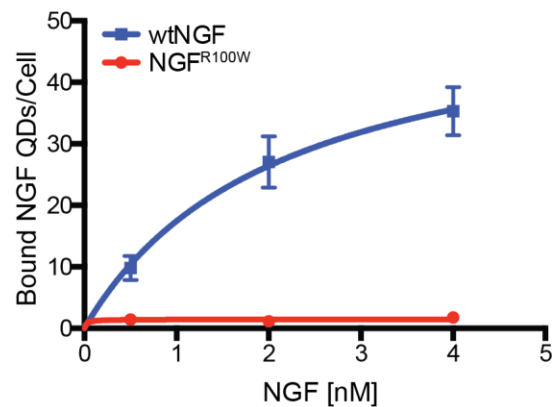

**C** wtNGF binding to p75<sup>NTR</sup>

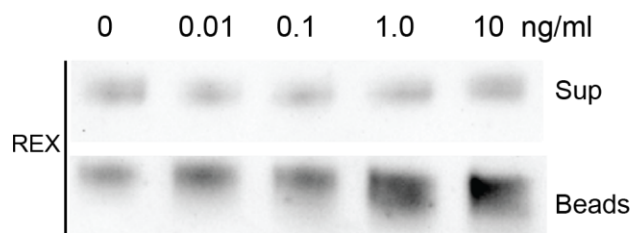

**D** NGFR<sup>100W</sup> binding to p75<sup>NTR</sup>

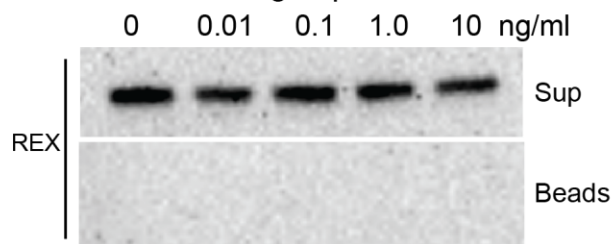

**E** wtNGF binding to p75<sup>NTR</sup>

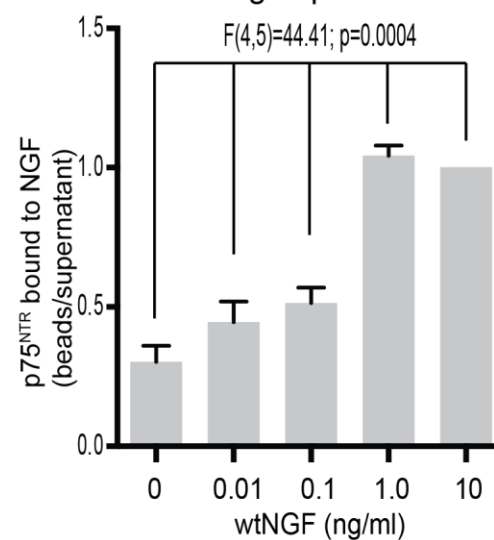

1

Fig 5  
Sung et al., 2018

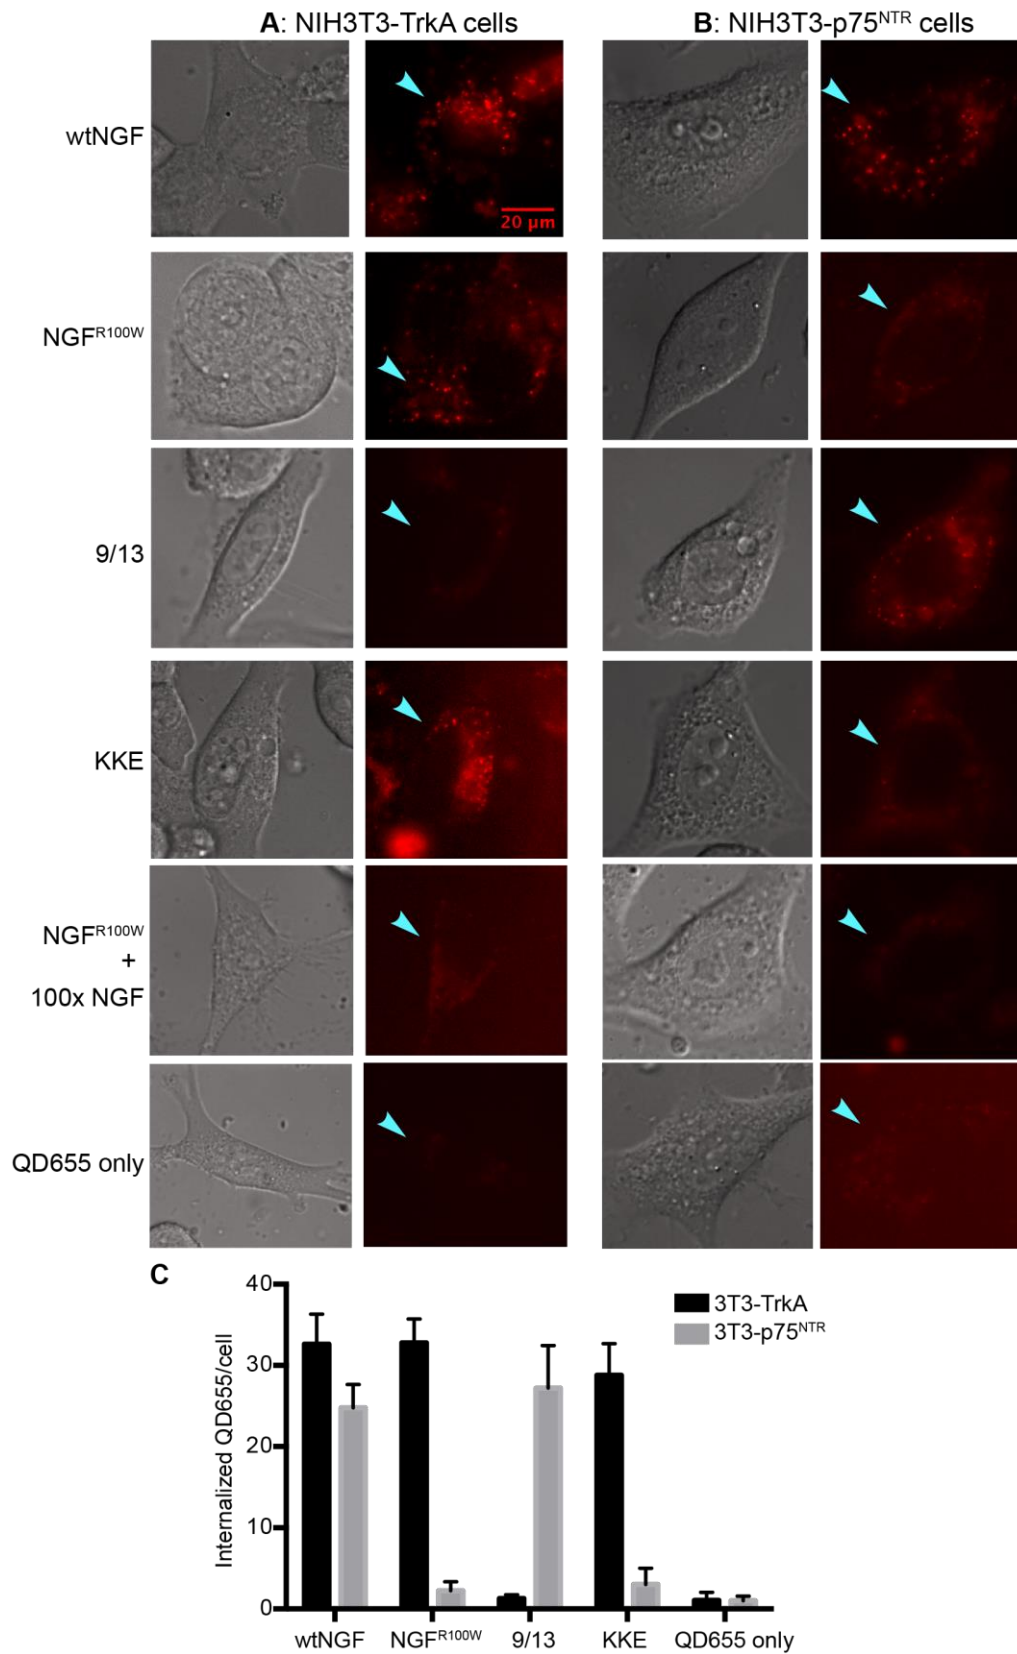

Fig 6  
Sung et al., 2018

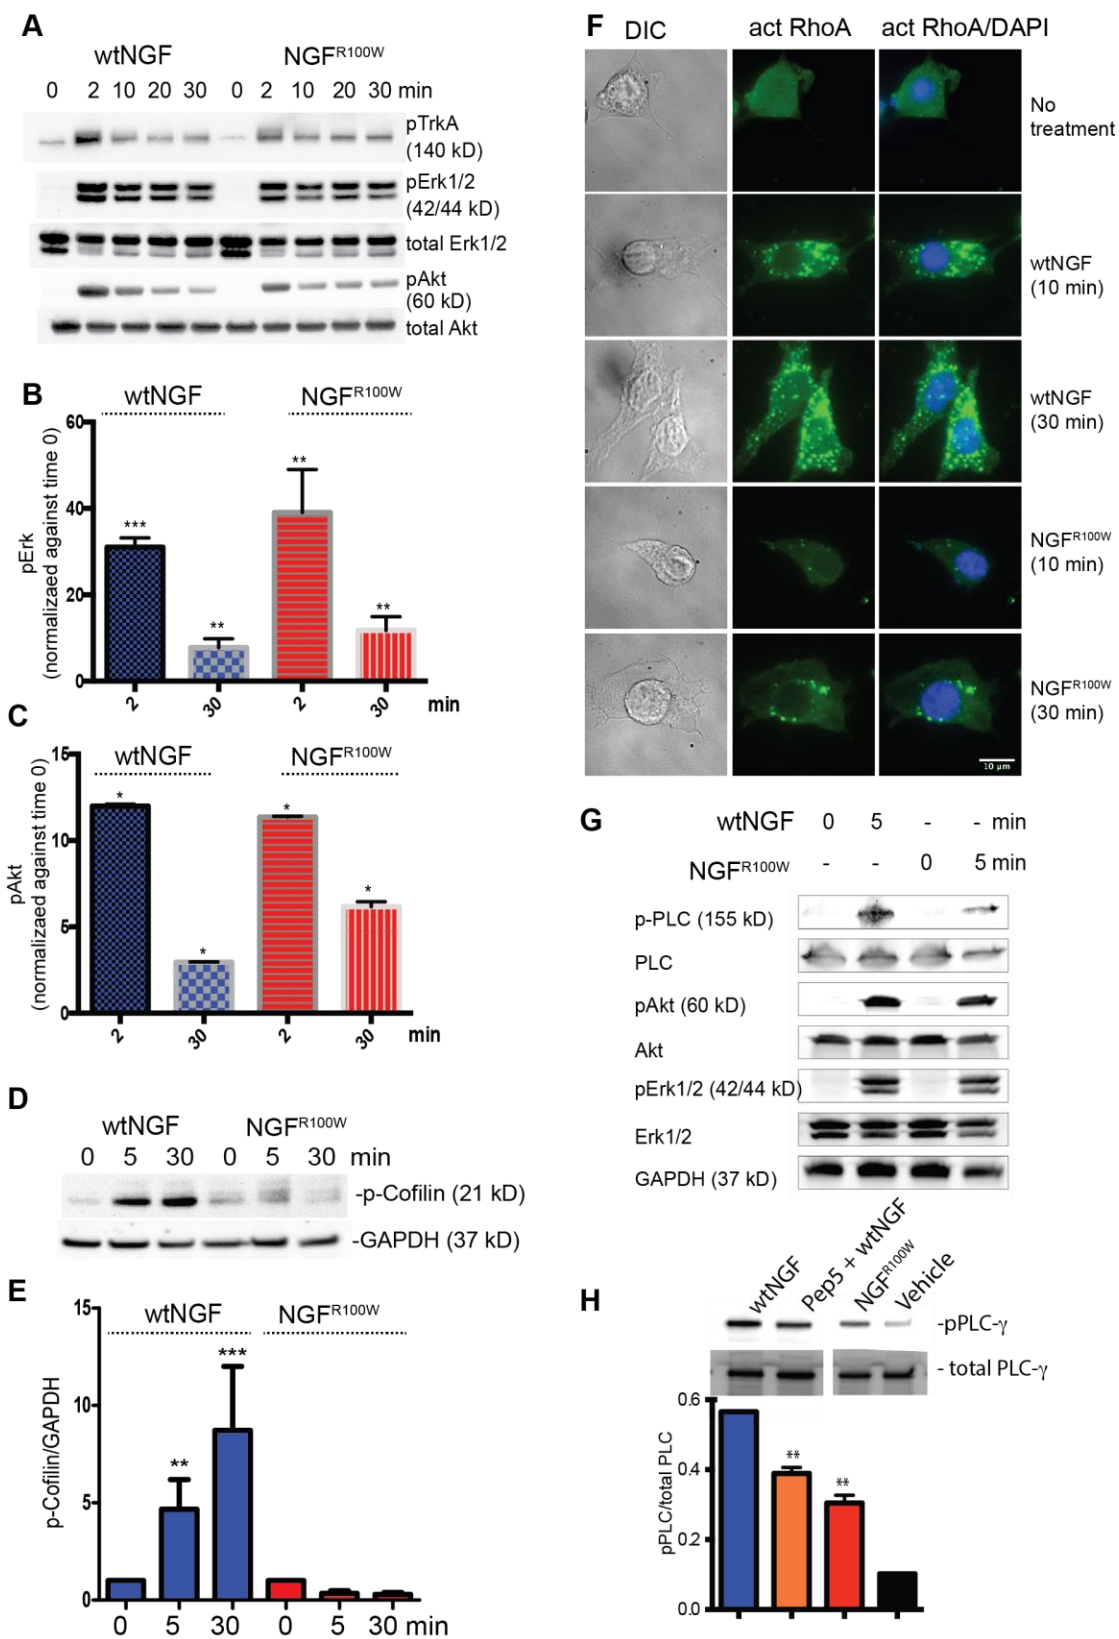



Fig 7  
Sung et al., 2018

**A: Displacement of wtNGF-QD605**

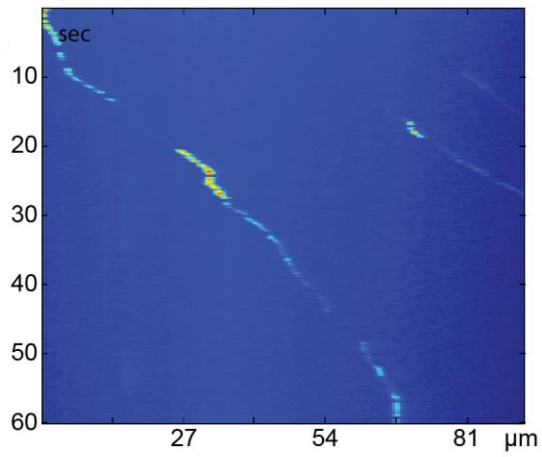

**B: Displacement of NGFR<sup>R100W</sup>-QD605**

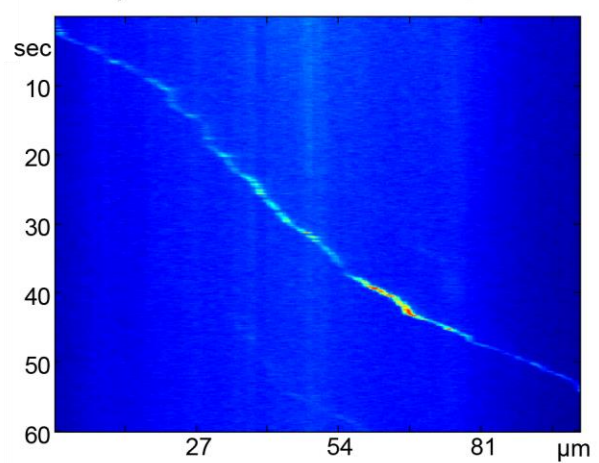

**C: Retrograde axonal transport**

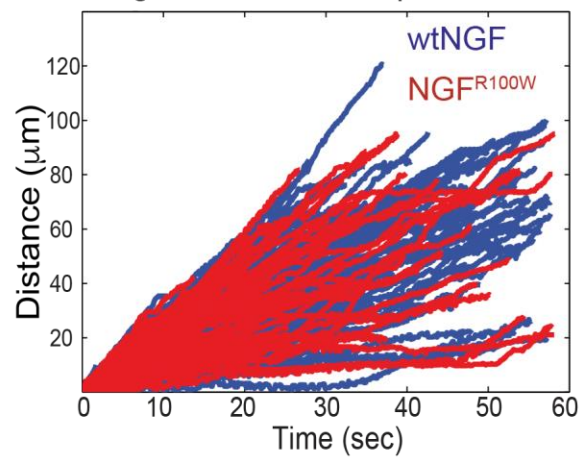

**D: Average transport speed**

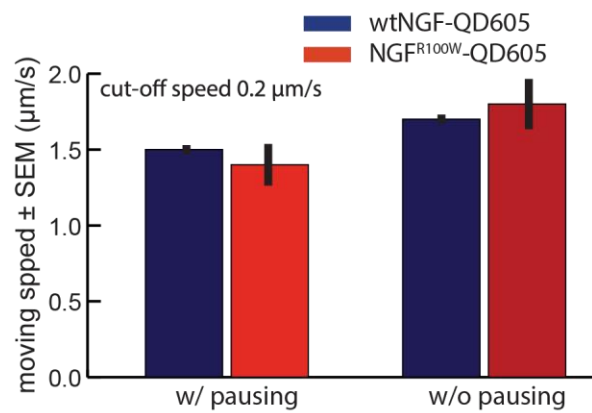

Fig 8  
Sung et al., 2018

**A: inhibitors**

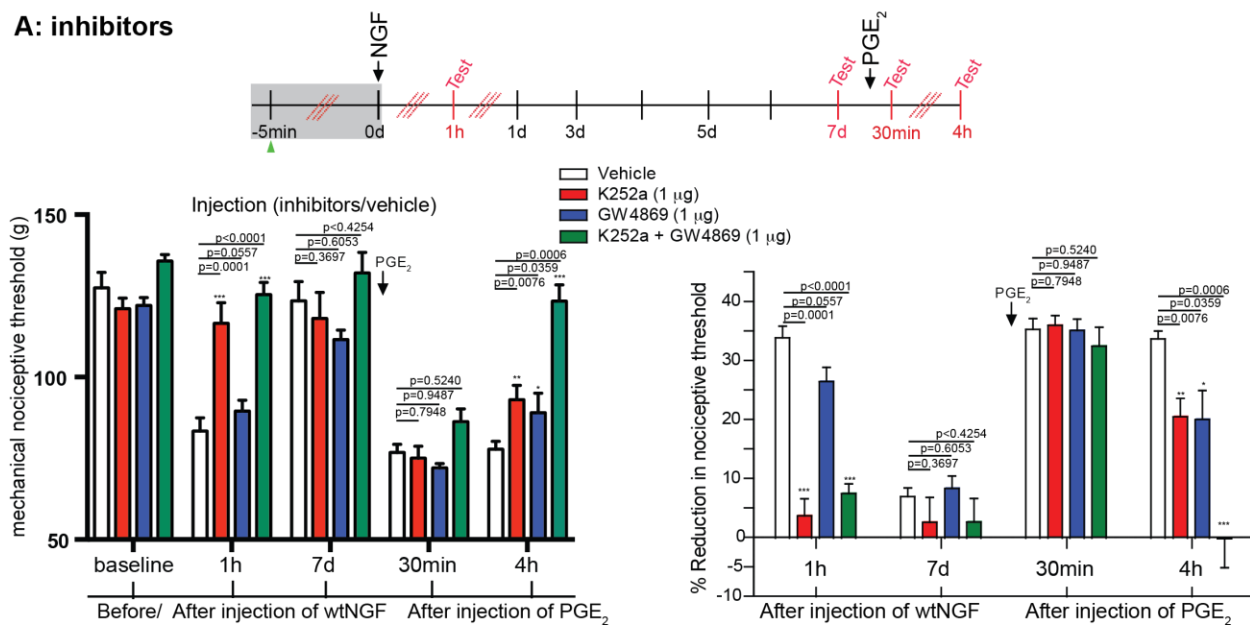

**B: dosage response of GW4869**

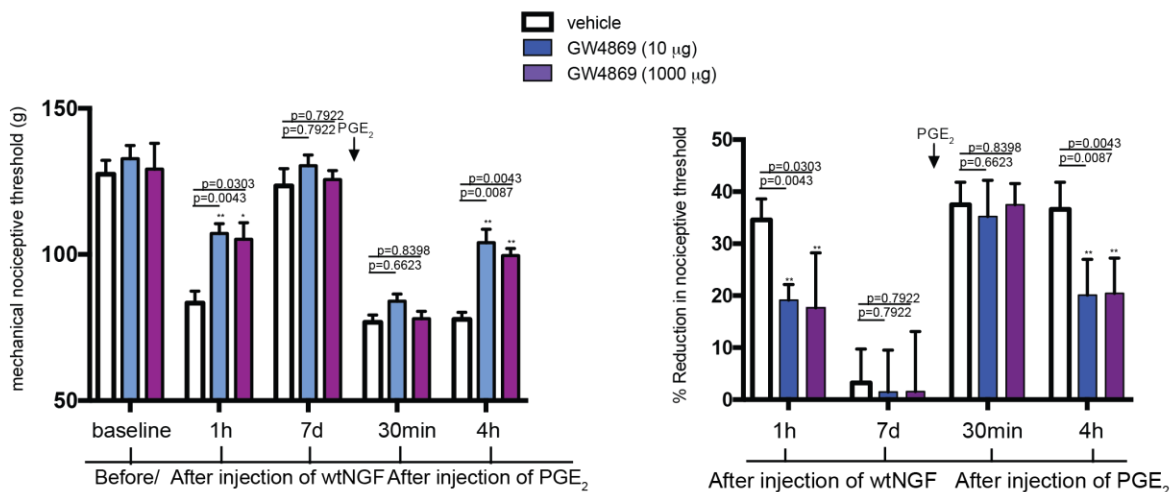

1  
2

Supplementary Figure 6-1\_Sung et al., 2018

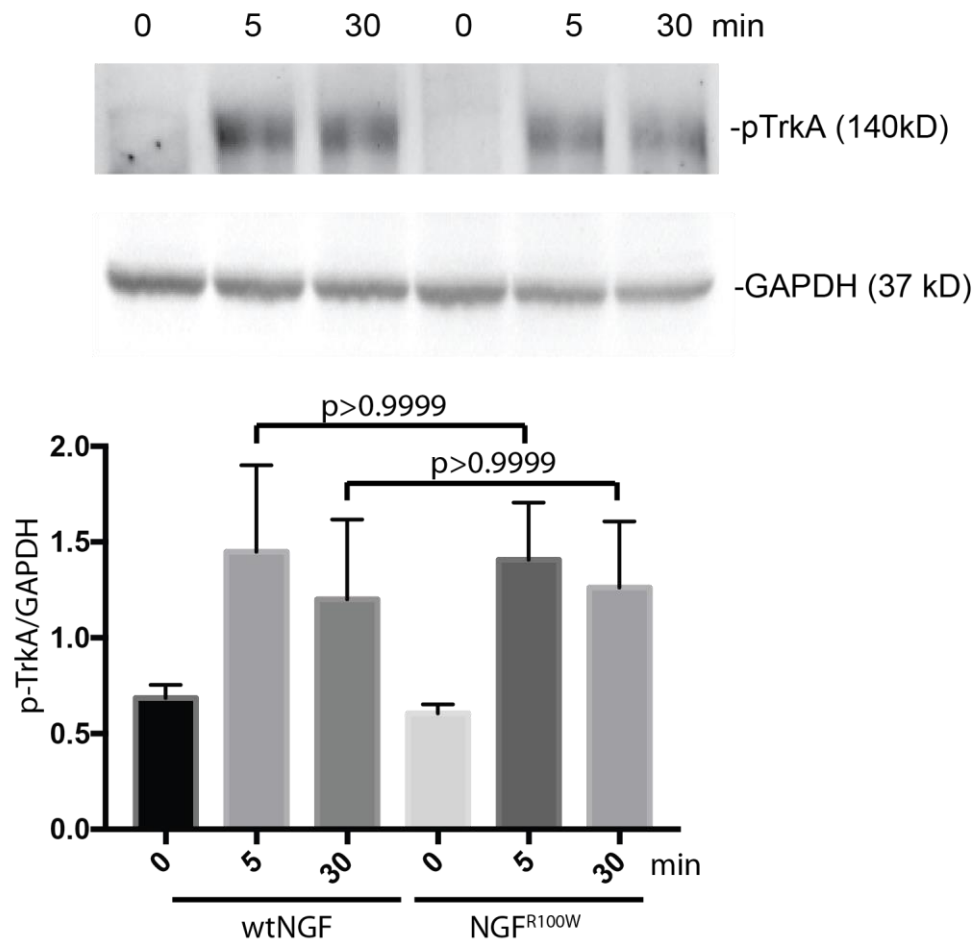

1
